# Supplementary material for: Responsiveness to high intensity interval training depends on insulin sensitivity and protein content and composition of small extracellular vesicles
Source: Research Square preprint supplement (doi:10.21203/rs.3.rs-105313/v1), 2020-12-02
Supplement: Supplementary file 1 [file 8647e332116484c3673316b9.docx]

**Supplementary information**

**Protein content of SEV differs between insulin-resistant and insulin-sensitive individuals**

Among the total SEV-associated proteins, we selected the candidates with low variability (q <0.05) and high degree of regulation (absolute log FC between groups >0.5). For the baseline condition, this strategy showed that expression of 31 SEV proteins differed between T2D-R and the nondiabetic groups (IS-NR and IR-R) (Fig. S4b, Table S6), indicating diabetes-related functionality of these proteins. They include **transferrin receptor protein 1 (TFRC), ceruloplasmin (CP) and adenylyl cyclase-associated protein 1 (CAP1)**, which mediates the **pro-inflammatory effects of resistin in the liver. Importantly, the expression** of 12 other SEV-derived proteins differed between IS-NR and the insulin-resistant groups (IR-R and T2D-R), including myeloperoxidase (MPO) and glycerol-3-phosphate dehydrogenase (GPD2) (Fig. S4b, Table S6).Lower expression in IS-NR was found for MPO, which is associated with insulin resistance and inflammation1, and for GPD2, a proposed target for preventing insulin resistance2 and regulator of skeletal muscle regeneration3. The latter represents a novel pathophysiologic marker for the early prediction of individual response of improved insulin sensitivity to exercising, as the reduction of this protein also attenuates exercise-mediated muscle mitochondrial biogenesis3,4.

**HIIT leads to enrichment of SEV proteins involved in cellular detoxification, lipid and glucose metabolism**

Functional analysis of the 262 SEV proteins differentially regulated by HIIT, showed a significant enrichment of proteins related to innate immunity, inflammatory response, cellular detoxification, lipid and glucose metabolism (Fig. S5a and Table S7). We also found an enrichment in proteins of membrane raft assembly (Fig. S5b), indicating a release of SEV characterized by the presence of raft-like domains5. The 262 differentially expressed SEV proteins were also analyzed with the Ingenuity™ Pathway Analysis (IPA) software, which outlines the canonical pathways and the upstream regulators responsible for the expression pattern of the molecules present in a dataset and predict inhibition at a z-score <-2 or activation at a z-score >2. The top enriched categories of canonical pathways and the upstream molecules related to HIIT are summarized in figures S5c and d.

**References**

1. Gomez Garcia, A., Rivera Rodriguez, M., Gomez Alonso, C., Rodriguez Ochoa, D.Y. & Alvarez Aguilar, C. Myeloperoxidase is associated with insulin resistance and inflammation in overweight subjects with first-degree relatives with type 2 diabetes mellitus. *Diabetes Metab J* **39**, 59-65 (2015).

2. Liu, J.*, et al.* Targeting mitochondrial biogenesis for preventing and treating insulin resistance in diabetes and obesity: Hope from natural mitochondrial nutrients. *Adv Drug Deliv Rev* **61**, 1343-1352 (2009).

3. Liu, X.*, et al.* Mitochondrial glycerol 3-phosphate dehydrogenase promotes skeletal muscle regeneration. *EMBO Mol Med* **10**(2018).

4. Bishop, D.J.*, et al.* High-Intensity Exercise and Mitochondrial Biogenesis: Current Controversies and Future Research Directions. *Physiology (Bethesda)* **34**, 56-70 (2019).

5. Valapala, M. & Vishwanatha, J.K. Lipid raft endocytosis and exosomal transport facilitate extracellular trafficking of annexin A2. *J Biol Chem* **286**, 30911-30925 (2011).

**Figure legends**

**Fig. S1.** Flow diagram of participants’ recruitment

**Fig. S2.** (a) Representative western blot of PKCs levels in the cytosolic (C) and membrane fraction (M), (b) PKCε (*p=0.03 for T2D; #p=0.03 T2D vs IR NDM, p=0.07 T2D vs IS NDM) and (c) PKCθ (*p=0.04 for T2D) activation, (d) NF-κB (**p=0.003 for IR NDM; #p=0.01 T2D vs IS NDM) protein levels at baseline and after 12-week HIIT in persons with T2D, insulin-resistant (IR NDM) and insulin-sensitive non-diabetic persons (IS NDM). Data are presented as mean ± SEM.

**Fig. S3.** VO2max (***p=0.0002 for T2D-R, ***p=7.1x10-5 for IR-R, *p=0.01 for IS-NR) (a), M value (**p=0.003 for T2D-R, ***p=0.0001 for IR-R, *p=0.01 for IS-NR) (b), hepatic insulin sensitivity (iEGP) (**p=0.002 for T2D-R; ##p=0.005 T2D-R vs IR-R, ###p=6.82x10-7 T2D-R vs IS-NR) (c), maximal uncoupled respiration (*p=0.03 for T2D-R, *p=0.01 for IR-R) (d), PKCɛ activation (e), NF-κB protein levels (*p=0.02 for IR-R) (f) in the representative subgroups of T2D-R (N=8), IR-R (N=8) and IS-NR (N=6). Data are presented as mean ± SEM.

**Fig. S4.** (a) Log2-fold change of SEV concentration after exercise intervention compared to baseline (&p=0.03 T2D-R vs IS-NR, &p=0.049 IR-R vs IS-NR) (b) Venn diagram showing the overlap of proteins differentially expressed between groups at baseline. Data are presented as mean ± SEM; *p*-value is based on unpaired t-test.

**Fig. S5.** (a) GO-BP and (b) GO-MF analysis of the 262 SEV proteins differentially expressed after 12-week HIIT with the percentage of proteins associated to each biological processes and function. (c) IPA analysis of pathways associated to the SEV-carried proteins regulated after exercise. Green color indicates a z-score >0; yellow color indicates a z-score <0; white bars indicate a z-score =0; gray bars indicate that the activation state cannot be predicted in IPA, despite a significant association of the molecules within the pathway. (d) Predicted upstream regulators with the highest p-value and a predicted z-score. Vertical red line indicates a B-H corrected p-value <0.05

**Table S1.** List of exosomes enriched proteins identified in the SEV preparations. All proteins are listed with protein name, gene symbol and UniProt ID.

**Table S2.** List of new SEV-carried proteins identified in the serum-derived SEV but not yet reported in Vesiclepedia. All proteins are listed with protein name, gene symbol and UniProt ID.

**Table S3.** List of proteins identified in the SEV preparations and showing a significant different expression after 12 weeks of training (absolute log FC 12-week HIIT vs baseline >0.5) in T2D-R, IR-R and IS-NR individuals. For each protein, the prediction of a secretory signal peptide (threshold >0.450) is given. For proteins without a SP, a score >0.6 identifies not classically secreted proteins (NCSP).

**Table S4.** List of SEV proteins differentially expressed after 12-week HIIT and overlapping with proteins regulated in skeletal muscle cells-derived SEV after EPS. All proteins are listed with protein name, gene symbol and UniProt ID.

**Table S5.** Gene ontology (GO) terms for biological process and molecular function and IPA pathway analysis of SEV proteins differentially expressed after 12-week HIIT in T2D-R, IR-R and IS-NR. For each enriched term and pathway, B-H corrected p-value <0.05 and the ratio of molecules present in the dataset/total molecules associated to the pathway are given. For IPA pathway, when possible only terms with a prediction of activation/inhibition (z-score) are given.

**Table S6.** List of SEV proteins differently expressed between groups, T2D-R, IR-R and IS-NR, at baseline. All proteins are listed with protein name, gene symbol and UniProt ID.

**Table S7.** List of SEV-associated proteins differentially expressed after HIIT and involved in glycolysis and/or antioxidant metabolism**.** FDR, false discovery rate; FC, fold change; GOBP, Gene onthology biological process.

**Supplementary Fig. S1:**

**
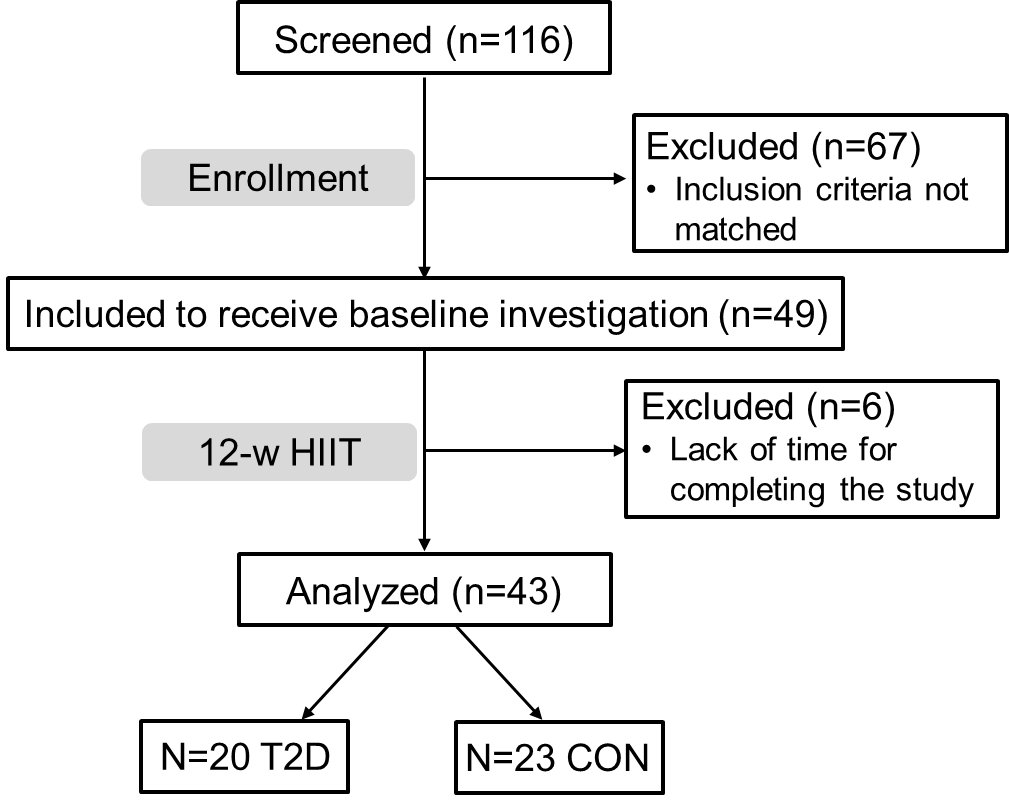
**

**Supplementary Fig. S2. Related to Fig. 1**

**
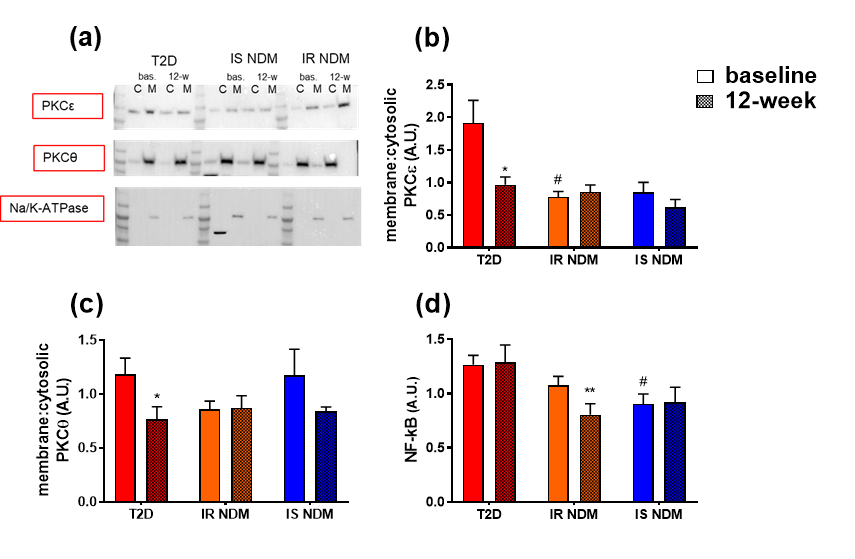
**

**Supplementary Fig. S3: Related to Fig. 3**

**Supplementary Fig. S4: Related to Fig. 3 and 4**


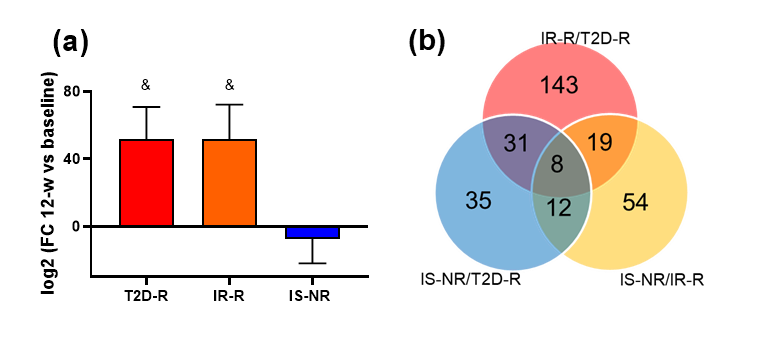


**Supplementary Fig. S5: Related to Fig. 4**

**Table S1. Related to table S3.**

| **Protein** | **Gene symbol** | **Uniprot ID** |
| --- | --- | --- |
| CD9 antigen | *CD9* | P21926 |
| Programmed cell death 6-interacting protein | *PDCD6IP* | Q8WUM4 |
| Heat shock cognate 71 kDa protein | *HSPA8* | P11142 |
| Glyceraldehyde-3-phosphate dehydrogenase | *GAPDH* | P04406 |
| Annexin A2 | *ANXA2* | P07355 |
| CD63 antigen | *CD63* | P08962 |
| Alpha-enolase | *ENO1* | P06733 |
| Heat shock protein HSP 90-alpha | *HSP90AA1* | P07900 |
| Tumor susceptibility gene 101 protein | *TSG101* | Q99816 |
| Pyruvate kinase PKM | *PKM* | P14618 |
| L-lactate dehydrogenase A chain | *LDHA* | P00338 |
| Elongation factor 1-alpha 1 | *EEF1A1* | P68104 |
| 14-3-3 protein zeta/delta | *YWHAZ* | P63104 |
| Phosphoglycerate kinase 1 | *PGK1* | P00558 |
| Elongation factor 2 | *EEF2* | P13639 |
| Fructose-bisphosphate aldolase A | *ALDOA* | P04075 |
| Annexin A5 | *ANXA5* | P08758 |
| Peptidyl-prolyl cis-trans isomerase A | *PPIA* | P62937 |
| Profilin-1 | *PFN1* | P07737 |
| Peroxiredoxin-1 | *PRDX1* | Q06830 |
| Cofilin-1 | *CFL1* | P23528 |
| Clathrin heavy chain 1 | *CLTC* | Q00610 |
| Moesin | *MSN* | P26038 |
| Triosephosphate isomerase | *TPI1* | P60174 |

**Table S2. Related to table S3 and fig. 4.**

| **Protein** | **Gene symbol** | **Uniprot ID** |
| --- | --- | --- |
| Complement C4-B | *C4B_2* | P0C0L5 |
| Vascular non-inflammatory molecule 2 | *VNN2* | O95498 |
| Immunoglobulin J chain | *JCHAIN* | P01591 |
| Adipocyte plasma membrane-associated protein | *APMAP* | Q9HDC9 |
| Mast cell-expressed membrane protein 1 | *MCEMP1* | Q8IX19 |
| Dematin | *DMTN* | Q08495 |
| Small integral membrane protein 1 | *SMIM1* | B2RUZ4 |
| Serine/threonine-protein kinase 26 | *STK26* | Q9P289 |
| Serine/threonine-protein kinase/endoribonuclease IRE1 | *ERN1* | O75460 |
| Nicotinate phosphoribosyltransferase | *NAPRT* | Q6XQN6 |
| Thromboxane A2 receptor | *TBXA2R* | P21731 |
| P2Y purinoceptor 12 | *P2RY12* | Q9H244 |
| Protein MTSS 1 | *MTSS1* | O43312 |
| Tenascin-N | *TNN* | Q9UQP3 |
| Transport and Golgi organization protein 2 homolog | *TANGO2* | Q6ICL3 |
| Atypical chemokine receptor 1 | *ACKR1* | Q16570 |
| Cytochrome c oxidase subunit 2 | *MT-CO2* | P00403 |
| BMP/retinoic acid-inducible neural-specific protein 1 | *BRINP1* | O60477 |
| FERM domain-containing protein 4B | *FRMD4B* | Q9Y2L6 |
| Nucleoside diphosphate-linked moiety X motif 13 | *NUDT13* | Q86X67 |
| Cytochrome P450 4F2 | *CYP4F2* | P78329 |
| Triokinase/FMN cyclase | *TKFC* | Q3LXA3 |
| Membrane protein MLC1 | *MLC1* | Q15049 |
| Negative elongation factor B | *NELFB* | Q8WX92 |
| Arginyl-tRNA--protein transferase 1 | *ATE1* | O95260 |
| Histone-lysine N-methyltransferase 2C | *KMT2C* | Q8NEZ4 |
| Complement C4-B | *ADGRE5* | P48960 |
| Vascular non-inflammatory molecule 2 | *MPL* | P40238 |
| Immunoglobulin J chain | *TFAP2D* | Q7Z6R9 |
| Adipocyte plasma membrane-associated protein | *EVA1B* | Q9NVM1 |
| Mast cell-expressed membrane protein 1 | *NT5C3A* | Q9H0P0 |
| Dematin | *TSPAN2* | O60636 |
| Small integral membrane protein 1 | *UPP2* | O95045 |
| Serine/threonine-protein kinase 26 | *RTCB* | Q9Y3I0 |
| Serine/threonine-protein kinase/endoribonuclease IRE1 | *C2CD5* | Q86YS7 |
| Nicotinate phosphoribosyltransferase | *C4B_2* | P0C0L5 |
| Thromboxane A2 receptor | *VNN2* | O95498 |
| P2Y purinoceptor 12 | *JCHAIN* | P01591 |
| Protein MTSS 1 | *APMAP* | Q9HDC9 |

**Table S3. Related to Fig. 4**

**Table S4. Related to Fig. 4.**

| **Protein** | **Gene symbol** | **Uniprot ID** |
| --- | --- | --- |
| Immunoglobulin heavy variable 6-1 | *HV601* | A0A0B4J1U7 |
| CD5 antigen-like | *CD5L* | O43866 |
| Haptoglobin | *HPT* | P00738 |
| Complement C3 | *CO3* | P01024 |
| Kininogen-1 | *KNG1* | P01042 |
| Immunoglobulin heavy constant mu | *IGHM* | P01871 |
| Immunoglobulin heavy constant alpha 1 | *IGHA1* | P01876 |
| Apolipoprotein A-I | *APOA1* | P02647 |
| Fibrinogen alpha chain | *FIBA* | P02671 |
| Fibrinogen beta chain | *FIBB* | P02675 |
| Fibrinogen gamma chain | *FIBG* | P02679 |
| Complement C1q subcomponent subunit B | *C1QB* | P02746 |
| Complement C1q subcomponent subunit C | *C1QC* | P02747 |
| Fibronectin | *FINC* | P02751 |
| C4b-binding protein alpha chain (Proline-rich protein) | *C4BPA* | P04003 |
| Histidine-rich glycoprotein | *HRG* | P04196 |
| Vitamin K-dependent protein S | *PROS* | P07225 |
| Apolipoprotein(a) | *APOA* | P08519 |
| 60 kDa heat shock protein, mitochondrial | *CH60* | P10809 |
| Lipopolysaccharide-binding protein (LBP) | *LBP* | P18428 |
| Moesin | *MOES* | P26038 |
| Erythrocyte band 7 integral membrane protein | *STOM* | P27105 |
| Elongation factor 1-delta | *EF1D* | P29692 |
| Transgelin-2 | *TAGL2* | P37802 |
| Guanine nucleotide-binding protein G(q) subunit alpha | *GNAQ* | P50148 |
| Alpha-centractin | *ACTZ* | P61163 |
| Ras-related protein Rap-1b | *RAP1B* | P61224 |
| Ras-related protein Rap-2b | *RAP2B* | P61225 |
| Peptidyl-prolyl cis-trans isomerase A | *PPIA* | P62937 |
| Tropomyosin alpha-4 chain | *TPM4* | P67936 |
| Actin, alpha skeletal muscle | *ACTS* | P68133 |
| Hemoglobin subunit beta | *HBB* | P68871 |
| Hemoglobin subunit alpha | *HBA* | P69905 |
| T-complex protein 1 subunit beta | *TCPB* | P78371 |
| Galectin-3-binding protein | *LG3BP* | Q08380 |
| Multimerin-1 | *MMRN1* | Q13201 |
| Bleomycin hydrolase | *BLMH* | Q13867 |
| Neutral amino acid transporter B(0) | *AAAT* | Q15758 |
| Aldehyde dehydrogenase family 16 member A1 | *A16A1* | Q8IZ83 |
| Protein/nucleic acid deglycase DJ-1 | *PARK7* | Q99497 |
| Adipocyte plasma membrane-associated protein (Protein BSCv) | *APMAP* | Q9HDC9 |
| T-complex protein 1 subunit alpha | *TCP1* | P17987 |
| Peroxiredoxin-2 | *PRDX2* | P32119 |
| Fermitin family homolog 3 | *FERMT3* | Q86UX7 |

**Table S5. Related to Fig. 5**

|  | **Pathway** | **N molecules in dataset/total N of molecules in pathway** | **Fold enrichment** | **B-H corrected p-value** |
| --- | --- | --- | --- | --- |
| **GO-BP T2D-R** |  |  |  |  |
| GO:0007596 | Blood coagulation | 17/169 | 16.85 | 1.3E-12 |
| GO:0002576 | Platelet degranulation | 17/124 | 22.97 | 1.22E-14 |
| GO:0043312 | Neutrophil degranulation | 22/484 | 7.61 | 4.64E-10 |
| GO:0006898 | Receptor-mediated endocytosis | 12/157 | 12.81 | 3.03E-07 |
| GO:0044267 | Cellular protein metabolic process | 14/200 | 11.73 | 3.23E-08 |
| GO:0006953 | Acute-phase response | 6/38 | 26.47 | 9.47E-05 |
| GO:0045087 | Innate immune response | 16/483 | 5.55 | 3.74E-05 |
| GO:0010951 | Negative regulation of endopeptidase activity | 6/52 | 19.35 | 0.000441 |
| GO:0051592 | Response to calcium ion | 6/57 | 17.65 | 0.000641 |
| GO:0007160 | Cell-matrix adhesion | 7/93 | 12.62 | 0.000747 |
| GO:0034447 | VLDL particle clearance | 3/6 | 83.86 | 0.00185 |
| GO:0050714 | Positive regulation of protein secretion | 5/44 | 19.06 | 0.002648 |
| GO:0090277 | Positive regulation of peptide hormone secretion | 3/9 | 55.94 | 0.006681 |
| GO: 0043687 | Post-translational protein modification | 11/344 | 5.84 | 0.000641 |
| GO:0061621 | Canonical glycolysis | 4/27 | 24.86 | 0.007271 |
| GO:0034374 | LDL particle remodeling | 3/13 | 38.74 | 0.017767 |
| GO:0015701 | Bicarbonate transport | 4/34 | 19.74 | 0.015665 |
| GO:0098869 | Cellular oxidant detoxification | 3/14 | 35.97 | 0.020906 |
| GO:0030185 | Nitric oxide transport | 2/3 | 111.81 | 0.02799 |
| GO:2000363 | Positive regulation of prostaglandin-E synthase activity | 2/3 | 111.81 | 0.02799 |
| **GO-BP IR-R** |  |  |  |  |
| GO:0002576 | Platelet degranulation | 19/124 | 24.095 | 1.9E-17 |
| GO:0043312 | Neutrophil degranulation | 31/484 | 10.06 | 1.86E-18 |
| GO:0043687 | Post-translational protein modification | 21/344 | 9.59 | 2.07E-11 |
| GO:0010498 | Proteasomal protein catabolic process | 8/23 | 54.70 | 2.98E-09 |
| GO:0030449 | Regulation of complement activation | 11/112 | 15.44 | 1.84E-07 |
| GO:0006521 | Regulation of cellular amino acid metabolic process | 8/52 | 24.20 | 1.42E-06 |
| GO:0042730 | Fibrinolysis | 7/22 | 50.04 | 9.84E-08 |
| GO:0038061 | NIK/NF-kappaB signaling | 8/59 | 21.33 | 3.42E-06 |
| GO:0035722 | IL-12-mediated signaling | 6/46 | 20.52 | 0.000196 |
| GO:0043488 | Regulation of mRNA stability | 11/113 | 15.30 | 1.84E-07 |
| GO:0060071 | Wnt signaling pathway | 8/87 | 14.46 | 4.39E-05 |
| GO:0070498 | IL-1-mediated signaling pathway | 8/95 | 13.24 | 8.06E-05 |
| GO:0019430 | Removal of superoxide radicals | 4/12 | 52.47 | 0.000284 |
| GO:0033209 | TNF-mediated signaling pathway | 8/115 | 10.94 | 0.000284 |
| GO:0010951 | Negative regulation of endopeptidase | 6/52 | 18.16 | 0.000349 |
| GO:0034599 | Cellular response to oxidative stress | 7/94 | 11.72 | 0.000785 |
| GO:0050714 | Positive regulation of protein secretion | 5/44 | 17.89 | 0.002326 |
| GO:0090277 | Positive regulation of peptide hormone secretion | 3/9 | 52.50 | 0.00533 |
| GO:0051592 | Response to calcium ion | 5/57 | 13.81 | 0.007408 |
| GO:0000165 | MAPK cascade | 9/250 | 5.66 | 0.007591 |
| GO:0006098 | Pentose-phopshate shunt | 3/13 | 36.35 | 0.014687 |
| GO:0034756 | Regulation of iron transport | 2/3 | 104.93 | 0.022849 |
| **GO-BP IS-NR** |  |  |  |  |
| GO:0043312 | Neutrophil degranulation | 21/484 | 9.96 | 1.71E-11 |
| GO:0044267 | Cellular protein metabolic process | 13/200 | 14.93 | 2.29E-08 |
| GO:0043687 | Post-translational protein modification | 14/344 | 9.34 | 1.12E-06 |
| GO:0010951 | Negative regulation of endopeptidase activity | 7/52 | 30.93 | 8.14E-06 |
| GO:0002576 | Platelet degranulation | 8/124 | 14.82 | 0.000121 |
| GO:0042744 | Hydrogen peroxide catabolic process | 5/27 | 42.57 | 0.00016 |
| GO:0034374 | LDL particle remodeling | 4/13 | 70.74 | 0.000316 |
| GO:0042158 | Lipoprotein biosynthetic process | 3/5 | 137.89 | 0.000645 |
| GO:0019708 | Cholesterol metabolic process | 6/72 | 19.156 | 0.000645 |
| GO:0034447 | VLDL particle clearance | 3/6 | 114.95 | 0.001205 |
| GO:0042730 | Fibrinolysis | 4/22 | 41.81 | 0.001486 |
| GO:0060628 | ER to Golgi vesicles-mediated transport | 8/191 | 9.62 | 0.001288 |
| GO:0070328 | Triglyceride homeostasis | 4/28 | 32.85 | 0.003343 |
| GO:0001523 | Retinoid metabolic process | 5/63 | 18.24 | 0.003931 |
| GO:0033700 | Phospholipid efflux | 3/12 | 57.52 | 0.007179 |
| GO:0015701 | Bicarbonate transport | 4/34 | 27.06 | 0.006143 |
| GO:0034380 | HDL particle assembly | 3/13 | 53.10 | 0.008715 |
| GO:0006953 | Acute-phase response | 4/38 | 24.21 | 0.008715 |
| GO:0098869 | Cellular oxidant detoxification | 3/14 | 49.31 | 0.010696 |
| GO:1904659 | Glucose transmembrane transport | 3/17 | 40.61 | 0.017594 |
| **GO-MF T2D-R** |  |  |  |  |
| GO:0008201 | Heparin binding | 12/170 | 11.83 | 1.83E-06 |
| GO:0005102 | Signaling receptor binding | 14/342 | 7.34 | 4.27E-06 |
| GO:0045296 | Cadherin binding | 12/305 | 7.14 | 5.06E-05 |
| GO:0030492 | Hemoglobin binding | 3/5 | 100.60 | 0.002153 |
| GO:0005200 | Structural constituent of cytoskeleton | 7/102 | 11.50 | 0.0022 |
| GO:0043177 | Organic acid binding | 3/10 | 50.35 | 0.014446 |
| GO:0005093 | Rab GDP-dissociation inhibitor activity | 2/2 | 167.44 | 0.01494 |
| GO:0002020 | Protease binding | 6/103 | 9.77 | 0.01494 |
| GO:0005344 | Oxygen carrier activity | 3/13 | 38.74 | 0.018298 |
| **GO-MF IR-R** |  |  |  |  |
| GO:0004175 | Endopeptidase activity | 10/70 | 22.46 | 4.6E-08 |
| GO:0045296 | Cadherin binding | 14/305 | 7.21 | 8.79E-06 |
| GO:0005102 | Signaling receptor binding | 13/342 | 5.97 | 0.000174 |
| GO:0016209 | Antioxidant activity | 4/19 | 33.14 | 0.002618 |
| GO:0008201 | Heparin binding | 9/170 | 8.32 | 0.000752 |
| GO:0005093 | Rab GDP-dissociation inhibitor activity | 2/2 | 157.14 | 0.012926 |
| GO:0005200 | Structural constituent of cytoskeleton | 6/102 | 9.25 | 0.014428 |
| GO:0051020 | GTPase binding | 4/34 | 18.52 | 0.016363 |
| GO:0008184 | Glycogen phosphorylase activity | 2/3 | 104.93 | 0.026421 |
| **GO-MF IS-NR** |  |  |  |  |
| GO:0005200 | Structural constituent of cytoskeleton | 9/102 | 20.27 | 2.57E-06 |
| GO:0008201 | Heparin binding | 9/170 | 12.16 | 0.000116 |
| GO:0060228 | Phosphatidylcholine-sterol O-acyltransferase activator activity | 3/6 | 114.95 | 0.001324 |
| GO:0120020 | Cholesterol transfer activity | 4/19 | 48.41 | 0.001297 |
| GO:0043177 | Organic acid binding | 3/10 | 69.01 | 0.005604 |
| GO:0005355 | Glucose transmembrane transporter activity | 3/13 | 53.10 | 0.009261 |
| GO:0005344 | Oxygen carrier activity | 3/13 | 53.10 | 0.009261 |
| GO:0031721 | Hemoglobin alpha binding | 2/3 | 153.27 | 0.018059 |
| GO:0034185 | Apolipoprotein binding | 3/17 | 40.61 | 0.018059 |
| GO:0016209 | Antioxidant activity | 3/19 | 36.34 | 0.021993 |
| **IPA** | **Canonical pathway** | **N of molecules/total N of molecules in pathway** | **z-score** | **B-H corrected p-value** |
| **T2D-R** | Acute Phase Response Signaling | 18/178 | 1.508 | 4.27E-15 |
|  | Coagulation System | 10/35 | 1.265 | 7.21E-13 |
|  | LXR/RXR Activation | 14/121 | -0.277 | 1.02E-12 |
|  | Complement System | 8/36 | -0.816 | 1.15E-09 |
|  | Clathrin-mediated Endocytosis Signaling | 14/193 | NaN | 3.74E-10 |
|  | Intrinsic prothrombin activation pathway | 8/41 | 1.134 | 3.10E-09 |
|  | FXR/RXR Activation | 12/125 | NaN | 4.23E-10 |
|  | Glycolysis I | 4/24 | -2.000 | 2.51E-04 |
|  | Production of Nitric Oxide and Reactive Oxygen Species in Macrophages | 8/185 | -2.646 | 2.71E-04 |
|  | G Beta gamma signaling | 6/122 | -2.449 | 1.31E-03 |
|  | eNOS Signaling | 6/152 | -1.342 | 3.14E-03 |
|  | p70S6K Signaling | 6/128 | -1.342 | 1.54E-03 |
|  | PPARα/RXRα Activation | 5/178 | -1.000 | 1.92E-02 |
|  | Insulin secretion signaling pathway | 7/238 | -1.134 | 4.84E-03 |
|  | ERK/MAPK Signaling | 6/192 | -2.2326 | 7.11E-03 |
|  | Protein Kinase A Signaling | 8/385 | -2.446 | 1.23E-02 |
|  | Phospholipase C signaling | 4/246 | -2.000 | 1.09-01 |
|  |  |  |  |  |
| **IR-R** | Acute phase response signaling | 23/178 | 0.577 | 2.23E-21 |
|  | Coagulation system | 11/35 | 1.508 | 1.55E-14 |
|  | LXR/RXR activation | 16/121 | -1.000 | 7.67E-15 |
|  | Complement system | 11/36 | -0.378 | 1.67E-14 |
|  | FXR/RXR Activation | 15/125 | NaN | 1.36E-13 |
|  | Intrinsic Prothrombin Activation Pathway | 7/41 | 1.633 | 2.84E-07 |
|  | Production of Nitric Oxide and Reactive Oxygen Species in Macrophages | 10/185 | 0.333 | 8.72E-06 |
|  | Clathrin-mediated Endocytosis Signaling | 10/192 | NaN | 1.12E-05 |
|  | HIF1α signaling | 8/201 | 0.707 | 8.19E-04 |
|  | NRF2-mediated Oxidative Stress Response | 6/186 | 2.000 | 1.61E-02 |
|  | Protein Kinase A signaling | 8/385 | 2.646 | 3.04E-02 |
|  | Nitric Oxide Signaling in the Cardiovascular System | 4/94 | 1,000 | 3.01E-02 |
| **IS-NR** | LXR/RXR Activation | 15/121 | -0.775 | 1.04E-15 |
|  | FXR/RXR Activation | 14/125 | NaN | 3.16E-14 |
|  | IL-12 Signaling and Production in Macrophages | 11/130 | NaN | 6.89E-10 |
|  | Production of Nitric Oxide and Reactive Oxygen Species in Macrophages | 12/185 | -2.309 | 1.39E-09 |
|  | Coagulation System | 7/35 | -0.378 | 6.20E-09 |
|  | Acute Phase Response Signaling | 11/178 | NaN | 1.219E-08 |
|  | Clathrin-mediated Endocytosis Signaling | 11/192 | NaN | 2.33E-08 |
|  | Type I DM Signaling | 5/107 | NaN | 2.52E-03 |
|  | Mitochondrial dysfunction | 5/165 | NaN | 1.58E-02 |
|  | Role of NFAT in regulation of the immune response | 5/176 | -1.000 | 1.96E-02 |

**Table S6. Related to Fig. S4**

| **Protein** | **Gene symbol** | **Uniprot ID** | **Group** |
| --- | --- | --- | --- |
| Ficolin-2 | FCN2 | Q15485 | T2D vs NDM |
| Ceruloplasmin | CERU | P00450 | T2D vs NDM |
| Platelet basic protein | CXCL7 | P02775 | T2D vs NDM |
| Ankyrin-1 | ANK1 | P16157 | T2D vs NDM |
| Bridging integrator 2 | BIN2 | Q9UBW5 | T2D vs NDM |
| Ficolin-3 | FCN3 | O75636 | T2D vs NDM |
| Phosphoglycerate kinase 1 | PGK1 | P00558 | T2D vs NDM |
| Transferrin receptor protein 1 | TFR1 | P02786 | T2D vs NDM |
| Adenylyl cyclase-associated protein 1 | CAP1 | Q01518 | T2D vs NDM |
| Rho GDP-dissociation inhibitor 2 | GDIR2 | P52566 | T2D vs NDM |
| Guanine nucleotide-binding protein subunit beta-2 | GBB2 | P62879 | T2D vs NDM |
| Ubiquitin-like modifier-activating enzyme 7 | UBA7 | P41226 | T2D vs NDM |
| Ras-related protein Rap-1b | RAP1B | P61224 | T2D vs NDM |
| cAMP-dependent protein kinase type I-alpha regulatory subunit | KAP0 | P10644 | T2D vs NDM |
| Platelet glycoprotein 4 | CD36 | P16671 | T2D vs NDM |
| Complement C1q subcomponent subunit C | C1QC | P02747 | T2D vs NDM |
| Ephrin-B1 | EFNB1 | P98172 | T2D vs NDM |
| Transgelin-2 | TAGL2 | P37802 | T2D vs NDM |
| Haptoglobin | HPT | P00738 | T2D vs NDM |
| Guanine nucleotide-binding protein G(q) subunit a | GNAQ | P50148 | T2D vs NDM |
| Delta-aminolevulinic acid dehydratase | HEM2 | P13716 | T2D vs NDM |
| Complement C1q subcomponent subunit B | C1QB | P02746 | T2D vs NDM |
| Beta-2-glycoprotein 1 | APOH | P02749 | T2D vs NDM |
| Zyxin | ZYX | Q15942 | T2D vs NDM |
| Tyrosine-protein kinase BTK | BTK | Q06187 | T2D vs NDM |
| T-complex protein 1 subunit gamma | TCPG | P49368 | T2D vs NDM |
| Rab GDP dissociation inhibitor beta | GDIB | P50395 | T2D vs NDM |
| Moesin | MOES | P26038 | T2D vs NDM |
| Annexin 5 | ANXA5 | P08758 | T2D vs NDM |
| 14-3-3 protein zeta/delta | YWHAZ | P63104 | T2D vs NDM |
| Serotransferrin | TF | P02787 | T2D vs NDM |
| Histone H3.2 | H32 | Q71DI3 | IS-NR vs IR |
| Complement factor H | CFAH | P08603 | IS-NR vs IR |
| Keratinocyte proline-rich protein | KPRP | Q5T749 | IS-NR vs IR |
| Platelet glycoprotein Ib alpha chain | GP1BA | P07359 | IS-NR vs IR |
| Myeloperoxidase | PERM | P05164 | IS-NR vs IR |
| Glycerol-3-phosphate dehydrogenase, mitochondrial | GPDM | P43304 | IS-NR vs IR |
| Multimerin-1 | MMRN1 | Q13201 | IS-NR vs IR |
| Keratin, type I cytoskeletal 16 | K1C16 | P08779 | IS-NR vs IR |
| Keratin, type I cytoskeletal 14 | K1C14 | P02533 | IS-NR vs IR |
| Histone H4 | H4 | P62805 | IS-NR vs IR |
| 60 kDa heat shock protein, mitochondrial | CH60 | P10809 | IS-NR vs IR |
| Desmoplakin | DESP | P15924 | IS-NR vs IR |
| Olfactomedin-4 | OLFM4 | Q6UX06 | IR-R vs IS-NR/T2D-R |
| Inter-alpha-trypsin inhibitor heavy chain H2 | ITIH2 | P19823 | IR-R vs IS-NR/T2D-R |
| Peroxisomal multifunctional enzyme type 2 | DHB4 | P51659 | IR-R vs IS-NR/T2D-R |
| Antithrombin-III | ANT3 | P01008 | IR-R vs IS-NR/T2D-R |
| Apolipoprotein E | APOE | P02649 | IR-R vs IS-NR/T2D-R |
| Coronin-1A | COR1A | P31146 | IR-R vs IS-NR/T2D-R |
| Integrin alpha-M | ITAM | P11215 | IR-R vs IS-NR/T2D-R |
| Calnexin | CALX | P27824 | IR-R vs IS-NR/T2D-R |
| HLA class I histocompatibility antigen, B alpha chain | HLAB | P01889 | IR-R vs IS-NR/T2D-R |
| Inter-alpha-trypsin inhibitor heavy chain H1 | ITIH1 | P19827 | IR-R vs IS-NR/T2D-R |
| Triosephosphate isomerase | TPIS | P60174 | IR-R vs IS-NR/T2D-R |
| Twinfilin-2 | TWF2 | Q6IBS0 | IR-R vs IS-NR/T2D-R |
| Prenylcysteine oxidase 1 | PCYOX | Q9UHG3 | IR-R vs IS-NR/T2D-R |
| Phosphatidylethanolamine-binding protein 1 | PEBP1 | P30086 | IR-R vs IS-NR/T2D-R |
| Apolipoprotein C-IV | APOC4 | P55056 | IR-R vs IS-NR/T2D-R |
| ADP-ribosylation factor 3 | ARF3 | P61204 | IR-R vs IS-NR/T2D-R |
| Heparin cofactor 2 | HEP2 | P05546 | IR-R vs IS-NR/T2D-R |
| Annexin 1 | ANXA1 | P04083 | IR-R vs IS-NR/T2D-R |
| Haptoglobin-related protein | HPTR | P00739 | IR-R vs IS-NR/T2D-R |

**Table S7. Related to Fig. S5.**

| Protein | Gene | Uniprot ID | Group | FDR | FC | GOBP |
| --- | --- | --- | --- | --- | --- | --- |
| Alpha-enolase | ENO1 | P06733 | T2D-R | 3.7E-09 | 0.65 | Canonical glycolysis |
| L-lactate dehydrogenase B chain | LDHB | P07195 | T2D-R | 1.71E-05 | 0.61 | Carbohydrate metabolic process |
| Phosphoglycerate kinase 1 | PGK1 | P00558 | T2D-R | 9.9E-05 | 0.56 | Glycolytic process |
| Pyruvate kinase PKM | PKM | P14618 | T2D-R | 0.0031 | 0.66 | Canonical glycolysis |
| Triosephosphate isomerase;Isoform 2 of Triosephosphate isomerase | TPI1 | P60174 | T2D-R | 1.2E-06 | 0.61 | Glycolytic process |
| Dynamin-1-like protein;Isoform 2 of Dynamin-1-like protein | DNM1L | O00429 | T2D-R | 0.0412 | 0.30 | Mitochondrial fission |
| Glutathione S-transferase omega-1 | GSTO1 | P78417 | T2D-R | 0.0062 | 0.66 | Cellular oxidant detoxification |
| Glutathione S-transferase P | GSTP1 | P09211 | T2D-R | 0.0012 | 0.60 | Response to reactive oxygen species |
| Haptoglobin | HP | P00738 | T2D-R | 0.0045 | 1.60 | Cellular oxidant detoxification |
| Protein/nucleic acid deglycase DJ-1 | PARK7 | Q99497 | T2D-R | 0.0007 | 0.61 | Response to oxidative stress |
| Apolipoprotein E | APOE | P02649 | T2D-R | 1.24E-17 | 0.48 | Response to reactive oxygen species |
| Solute carrier family 2, facilitated glucose transporter member 1 | SLC2A1 | P11166 | T2D-R | 6.16E-07 | 2.58 | Glucose transport |
| Hemoglobin subunit beta | HBB | P68871 | T2D-R | 4.65E-08 | 2.02 | Cellular oxidant detoxification |
| Apolipoprotein E | APOE | P02649 | IR-R | 1.4E-05 | 2.15 | Response to reactive oxygen species |
| Catalase | CAT | P04040 | IR-R | 0.0013 | 1.59 | Response to reactive oxygen species |
| Serum albumin | ALB | P02768 | IR-R | 1.9E-21 | 0.58 | Cellular oxidant detoxification |
| Alpha-enolase | ENO1 | P06733 | IR-R | 5.2E-05 | 1.81 | Canonical glycolysis |
| Copper chaperone for superoxide dismutase | CCS | O14618 | IR-R | 0.0368 | 2.68 | Cellular response to oxidative stress |
| Glucose-6-phosphate 1-dehydrogenase;Isoform Long of Glucose-6-phosphate 1-dehydrogenase;Isoform 3 of Glucose-6-phosphate 1-dehydrogenase | G6PD | P11413 | IR-R | 0.0039 | 1.55 | Glucose metabolic process, cellular response to oxidative stress |
| Peroxiredoxin-1 | PRDX1 | Q06830 | IR-R | 0.0209 | 1.65 | Cellular response to oxidative stress |
| Peroxiredoxin-2 | PRDX2 | P32119 | IR-R | 0.0185 | 1.91 | Cellular response to oxidative stress |
| Superoxide dismutase [Mn], mitochondrial;Isoform 4 of Superoxide dismutase [Mn], mitochondrial | SOD2 | P04179 | IR-R | 0.0093 | 1.71 | Cellular response to oxidative stress |
| L-lactate dehydrogenase B chain | LDHB | P07195 | IR-R | 0.00026 | 1.50 | Carbohydrate metabolic process |
| Triosephosphate isomerase;Isoform 2 of Triosephosphate isomerase | TPI1 | P60174 | IR-R | 0.0189 | 1.86 | Glycolitic process |
| Dynamin-1-like protein;Isoform 2 of Dynamin-1-like protein | DNM1L | O00429 | IR-R | 1.4E-05 | 1.73 | Mitochondrial fission |
| Retinol-binding protein 4 | RBP4 | P02753 | IR-R | 0.00228 | 0.46 | Gluconeogenesis |
| Hexokinase-1 | HK1 | P19367 | IS-NR | 8.5E-04 | 1.75 | Glycolitic process |
| Isocitrate dehydrogenase [NADP] cytoplasmic | IDH1 | O75874 | IS-NR | 0.0332 | 2.66 | Response to oxidative stress |
| Nicotinate phosphoribosyltransferase;Isoform 3 of Nicotinate phosphoribosyltransferase | NAPRT | Q6XQN6 | IS-NR | 0.0139 | 1.83 | Response to oxidative stress |
| Delta-aminolevulinic acid dehydratase | ALAD | P13716 | IS-NR | 8.3E-05 | 2.11 | Response to oxidative stress |
| Cytochrome c | CYCS | P99999 | IS-NR | 0.0409 | 1.66 | Cellular response to oxidative stress |
| Hemoglobin subunit beta | HBB | P68871 | IS-NR | 3.6E-05 | 2.59 | Cellular oxidant detoxification |
| Hemoglobin subunit alpha | HBA1 | P69905 | IS-NR | 9.9E-06 | 2.57 | Cellular oxidant detoxification |
| Retinol-binding protein 4 | RBP4 | P02753 | IS-NR | 0.0205 | 1.93 | Gluconeogenesis |
| Solute carrier family 2, facilitated glucose transporter member 1 | SLC2A1 | P11166 | IS-NR | 1.6E-02 | 3.54 | Glucose transport |
| Solute carrier family 2, facilitated glucose transporter member 3 | SLC2A3 | P11169 | IS-NR | 3.2E-02 | 1.72 | Glucose transport |
| Apolipoprotein E | APOE | P02649 | IS-NR | 3.2E-36 | 0.48 | Response to ROS |
| Catalase | CAT | P04040 | IS-NR | 4.3E-05 | 1.85 | Response to ROS |
