# Supplementary material for: Responsiveness to high intensity interval training depends on insulin sensitivity and protein content and composition of small extracellular vesicles
Source: Research Square preprint supplement (doi:10.21203/rs.3.rs-105313/v1), 2020-12-02
Supplement: Supplementary file 2 [file aef79d398089b87c5736375b.docx]

**Inclusion/exclusion criteria**

Overweight/obese patients (BMI > 25 kg/m²) with type 2 diabetes (n=20), age- and BMI- matched insulin resistant glucose tolerant and age- matched lean insulin sensitive glucose tolerant humans (n=23), aged from 30-65 years are included in the study. Participants with medical history of heart or renal insufficiency, malignancies, COPD, and intake of immunomodulatory medication, insulin therapy or beta-blockers are excluded from the study. The participants have to be also sedentary, defined as performing less than 60 minutes endurance training, not more often than once per week. Patient enrollment starts in 2014 and the last patient was enrolled in 2018.

**Training protocol**

The training program consists of three training sessions per week and its total duration is 12 weeks. Each session consists of 4 brief (4 minutes) exercise intervals of high intensity (90% of maximal heart rate), which are interspersed by 3 recovery periods (3 minutes), during which the participant keeps training at a lower intensity (70% of maximal heart rate) for a total duration of 35 minutes.

**Assessment of metabolic parameters**

During the basal investigation, muscle and fat biopsies, an oral glucose tolerance test and a two-steps hyperinsulinemic-euglycemic clamp are performed, for assessment of hepatic and peripheral insulin sensitivity and endogenous glucose production. Liver ATP, liver- and whole-body fat MRI measurements are performed. These parameters are also measured acutely after the first bout of exercise, acutely after the last bout of exercise and72 hours after the last exercise session, in order to examine the chronic effect. After 4 weeks of training pause the measurements are repeated, in order to examine the remaining effects of the training (detraining). The participants´ weight is closely monitored and has to remain stable during the intervention (± 5% of the initial body weight). Spiroergometry is performed every 4 weeks in order to evaluate the improvement of respiratory parameters during the training intervention. Furthermore myocellular pathways and exosome analysis are initially conducted pilot groups at baseline and after chronic training intervention.

**Primary and secondary outcomes of the study**

Primary outcome is the improvement of peripheral and hepatic insulin sensitivity after 12 weeks of training. Secondary outcomes are the improvement of mitochondrial function, oxidative capacity and liver fat content and the investigation of possible mechanisms (Exosomes, cellular pathways) that define response/non-response to these parameters.

**Statistic analysis**

Data are presented as mean and standard error of mean (±SEM) or median (1st and 3rd quartile). Variables with a skewed distribution are log-transformed before analysis. ANCOVA-like linear regression analyses of baseline to 12-week HIIT changes allowing for different residual variances between the investigated groups and t-tests are performed. Logistic regression analysis is used to estimate the probability of responder-status in each group. Group sizes are calculated using a power calculation. At an α-level of 0,05 we have a power of 80% for independent variables and 97% power for dependent variables for identifying a difference of 30%.
