# Supplementary material for: Responsiveness to high intensity interval training depends on insulin sensitivity and protein content and composition of small extracellular vesicles
Source: Research Square preprint supplement (doi:10.21203/rs.3.rs-105313/v1), 2020-12-02
Supplement: Supplementary file 4 [file 3b73c3a2f789095850fa7b7d.xlsx]

## Sheet: comparison 12-wk vs baseline
Table S3 List of significant SEV proteins 12-wk versus baseline in T2D-R (N=5), IR-R (N=5) and IS-NR (N=5)
Protein	Gene	Uniprot ID	group	q value	FC 12-wk vs baseline	Cleavage site	Score	SP
Immunoglobulin lambda variable 2-18	IGLV2-18	A0A075B6J9	IR-R	0.0246483	2.61918	19	0.896	YES
Immunoglobulin heavy variable 6-1	IGHV6-1	A0A0B4J1U7	IR-R	0.00183357	0.396465	20	0.826	YES
Dynamin-1-like protein;Isoform 2 of Dynamin-1-like protein	DNM1L	O00429	IR-R	1.3921e-05	1.72772		0.261	NO
Copper chaperone for superoxide dismutase	CCS	O14618	IR-R	0.0367817	2.68387		0.600	NCSP
Proteasome subunit alpha type-7	PSMA7	O14818	IR-R	0.0247822	2.096		0.248	NO
Aflatoxin B1 aldehyde reductase member 2	AKR7A2	O43488	IR-R	0.0414568	1.56618		0.734	NCSP
Keratin, type II cuticular Hb6	KRT86	O43790	IR-R	0.0456775	0.361156		0.167	NO
Dynactin subunit 3;Isoform 2 of Dynactin subunit 3;Isoform 3 of Dynactin subunit 3	DCTN3	O75935	IR-R	0.0360169	1.91033		0.433	NO
Keratin, type I cuticular Ha3-I	KRT33A	O76009	IR-R	0.0218615	0.373376		0.592	NO
Vascular non-inflammatory molecule 2;Isoform 6 of Vascular non-inflammatory molecule 2	VNN2	O95498	IR-R	4.09476e-05	0.460676	22	0.614	YES
Caveolae-associated protein 2	CAVIN2	O95810	IR-R	0.000210822	1.54043		0.202	NO
Coagulation factor XIII A chain	F13A1	P00488	IR-R	0.0162863	1.90383		0.373	NO
Purine nucleoside phosphorylase	PNP	P00491	IR-R	0.000828714	1.65512		0.509	NO
Plasminogen	PLG	P00747	IR-R	0.00306973	0.618874	19	0.767	YES
Complement factor B	CFB	P00751	IR-R	2.19832e-05	0.515589	25	0.743	YES
Antithrombin-III	SERPINC1	P01008	IR-R	2.71488e-24	0.408471	34	0.611	YES
Alpha-1-antitrypsin	SERPINA1	P01009	IR-R	6.91297e-08	3.29009	24	0.916	YES
Alpha-2-macroglobulin	A2M	P01023	IR-R	1.15363e-13	0.600742	23	0.873	YES
Complement C3	C3	P01024	IR-R	3.47979e-49	0.466443	22	0.905	YES
Complement C5	C5	P01031	IR-R	1.6332e-09	0.385653	18	0.898	YES
Kininogen-1	KNG1	P01042	IR-R	1.21364e-06	0.667004	23	0.781	YES
Immunoglobulin heavy constant gamma 2	IGHG2	P01859	IR-R	9.73238e-05	0.599421		0.638	NCSP
Keratin, type I cytoskeletal 14	KRT14	P02533	IR-R	0.0335248	1.55153		0.446	NO
Apolipoprotein E	APOE	P02649	IR-R	1.44242e-05	5.42336	18	0.919	YES
Fibrinogen alpha chain	FGA	P02671	IR-R	9.41847e-11	5.26729	19	0.812	YES
Fibrinogen beta chain	FGB	P02675	IR-R	2.81563e-06	3.39754	30	0.861	YES
Fibrinogen gamma chain;Isoform Gamma-A of Fibrinogen gamma chain	FGG	P02679	IR-R	1.6777e-06	4.02601	26	0.808	YES
Complement C1q subcomponent subunit B	C1QB	P02746	IR-R	0.000241269	0.509563	27	0.935	YES
Complement C1q subcomponent subunit C	C1QC	P02747	IR-R	0.00203688	0.571875	28	0.878	YES
Complement component C9	C9	P02748	IR-R	0.00170692	0.668315	26	0.606	YES
Retinol-binding protein 4	RBP4	P02753	IR-R	0.00227944	0.461448	18	0.923	YES
Alpha-1-acid glycoprotein 1	ORM1	P02763	IR-R	0.011531	0.635449	18	0.940	YES
Alpha-2-HS-glycoprotein	AHSG	P02765	IR-R	0.00666791	0.560244	18	0.880	YES
Serum albumin	ALB	P02768	IR-R	1.85433e-21	0.575891	18	0.848	YES
Serotransferrin	TF	P02787	IR-R	8.0424e-15	1.56475	19	0.934	YES
Hemopexin	HPX	P02790	IR-R	1.05373e-05	0.543218	31	0.776	YES
Plasma kallikrein	KLKB1	P03952	IR-R	5.31028e-05	0.571112	19	0.632	YES
Catalase	CAT	P04040	IR-R	0.0012546	1.58913		0.406	NO
Annexin 1	ANXA1	P04083	IR-R	0.0278373	2.96004		0.511	NO
Apolipoprotein B-100	APOB	P04114	IR-R	0.00270482	2.51837	27	0.930	YES
Superoxide dismutase [Mn], mitochondrial;Isoform 4 of Superoxide dismutase [Mn], mitochondrial	SOD2	P04179	IR-R	0.0093277	1.7144	27	0.930	YES
Histidine-rich glycoprotein	HRG	P04196	IR-R	0.00156078	9.29442	18	0.910	YES
Alpha-1B-glycoprotein	A1BG	P04217	IR-R	1.43286e-06	0.495643	21	0.875	YES
Keratin, type II cytoskeletal 1	KRT1	P04264	IR-R	2.45338e-08	1.70018		0.099	NO
Heparin cofactor 2	SERPIND1	P05546	IR-R	0.00967432	0.423876	19	0.862	YES
Alpha-enolase	ENO1	P06733	IR-R	5.16947e-05	1.80661		0.536	NO
L-lactate dehydrogenase B chain	LDHB	P07195	IR-R	0.000262714	1.50175		0.569	NO
Heat shock protein HSP 90-alpha;Isoform 2 of Heat shock protein HSP 90-alpha	HSP90AA1	P07900	IR-R	0.00109245	1.51681		0.173	NO
Thrombospondin-1	THBS1	P07996	IR-R	0.000157558	1.51755	18	0.742	YES
Apolipoprotein(a)	LPA	P08519	IR-R	4.74684e-12	3.2199	19	0.682	YES
Complement factor H	CFH	P08603	IR-R	4.07371e-08	0.504819	18	0.911	YES
Complement C4-B	C4B	P0C0L5	IR-R	3.70329e-09	12.812	19	0.731	YES
Complement component C7	C7	P10643	IR-R	0.0111184	0.513393	22	0.630	YES
Heat shock cognate 71 kDa protein	HSPA8	P11142	IR-R	1.41337e-05	1.64134		0.229	NO
Integrin alpha-M;Isoform 2 of Integrin alpha-M	ITGAM	P11215	IR-R	0.00092946	3.48208	16	0.868	YES
Glycogen phosphorylase, brain form	PYGB	P11216	IR-R	4.65724e-05	1.88523		0.422	NO
Glycogen phosphorylase, muscle form	PYGM	P11217	IR-R	0.000493256	1.59017		0.397	NO
Glucose-6-phosphate 1-dehydrogenase;Isoform Long of Glucose-6-phosphate 1-dehydrogenase;Isoform 3 of Glucose-6-phosphate 1-dehydrogenase	G6PD	P11413	IR-R	0.00397529	1.55451		0.449	NO
Collagen alpha-3(VI) chain	COL6A3	P12111	IR-R	0.000903262	0.497424	25	0.863	YES
Keratin, type II cytoskeletal 5	KRT5	P13647	IR-R	0.0332847	1.66572		0.093	NO
Complement component C6	C6	P13671	IR-R	0.00668969	0.646325	21	0.810	YES
cAMP-dependent protein kinase type II-alpha regulatory subunit;Isoform 2 of cAMP-dependent protein kinase type II-alpha regulatory subunit	PRKAR2A	P13861	IR-R	0.0368793	1.72089		0.622	NCSP
Aminopeptidase N	ANPEP	P15144	IR-R	3.31454e-06	0.547502		0.575	NO
Desmoplakin	DSP	P15924	IR-R	0.0111351	2.09616		0.183	NO
Protein kinase C alpha type	PRKCA	P17252	IR-R	0.0169583	1.53909		0.348	NO
T-complex protein 1 subunit alpha	TCP1	P17987	IR-R	0.0498481	1.55531		0.518	NO
Vinculin;Isoform 1 of Vinculin	VCL	P18206	IR-R	3.84968e-23	1.98228		0.181	NO
Inter-alpha-trypsin inhibitor heavy chain H2	ITIH2	P19823	IR-R	6.74325e-07	0.302275	18	0.791	YES
Inter-alpha-trypsin inhibitor heavy chain H1	ITIH1	P19827	IR-R	0.000401303	0.313547	29	0.760	YES
Proteasome subunit beta type-1	PSMB1	P20618	IR-R	0.00154266	1.98314		0.473	NO
Pregnancy zone protein	PZP	P20742	IR-R	0.0267879	0.605933	25	0.839	YES
Isoform 3 of Nucleoside diphosphate kinase B	NME2	P22392	IR-R	0.00322479	1.53633		0.330	NO
Receptor-type tyrosine-protein phosphatase beta;Isoform 3 of Receptor-type tyrosine-protein phosphatase beta	PTPRB	P23467	IR-R	0.0180413	0.613372	22	0.871	YES
Myosin regulatory light polypeptide 9	MYL9	P24844	IR-R	0.0169539	1.5605		0.576	NO
Proteasome subunit alpha type-1;Isoform Long of Proteasome subunit alpha type-1	PSMA1	P25786	IR-R	0.00300084	2.01294		0.371	NO
Proteasome subunit alpha type-3;Isoform 2 of Proteasome subunit alpha type-3	PSMA3	P25788	IR-R	0.00340241	2.10826		0.256	NO
Moesin	MSN	P26038	IR-R	0.000747576	15.7468		0.530	NO
Elongation factor 1-gamma;Isoform 2 of Elongation factor 1-gamma	EEF1G	P26641	IR-R	0.0104427	2.17243		0.353	NO
Proteasome subunit beta type-8;Isoform 2 of Proteasome subunit beta type-8	PSMB8	P28062	IR-R	0.000470794	2.04522		0.517	NO
Proteasome subunit alpha type-5	PSMA5	P28066	IR-R	0.00463193	2.08096		0.485	NO
Proteasome subunit beta type-5	PSMB5	P28074	IR-R	0.0108179	3.46761		0.726	NCSP
Tripeptidyl-peptidase 2	TPP2	P29144	IR-R	0.0309562	37.8518		0.413	NO
Elongation factor 1-delta;Isoform 2 of Elongation factor 1-delta	EEF1D	P29692	IR-R	0.0174574	2.20597		0.529	NO
Peptidyl-prolyl cis-trans isomerase F, mitochondrial	PPIF	P30405	IR-R	0.0166191	2.47582		0.683	NCSP
Rab GDP dissociation inhibitor alpha	GDI1	P31150	IR-R	0.0176584	1.51649		0.429	NO
Peroxiredoxin-2	PRDX2	P32119	IR-R	0.0185301	1.9058		0.522	NO
Kinesin-1 heavy chain	KIF5B	P33176	IR-R	0.0425138	1.91899		0.202	NO
Heat shock 70 kDa protein 4	HSPA4	P34932	IR-R	0.0227536	1.73351		0.226	NO
Keratin, type I cytoskeletal 9	KRT9	P35527	IR-R	1.10704e-05	1.81055		0.089	NO
Transgelin-2;Isoform 2 of Transgelin-2	TAGLN2	P37802	IR-R	0.00110736	2.74172		0.784	NCSP
Transaldolase	TALDO1	P37837	IR-R	0.0416301	1.5272		0.394	NO
Platelet glycoprotein V	GP5	P40197	IR-R	0.00130965	2.83508	16	0.844	YES
Malate dehydrogenase, mitochondrial	MDH2	P40926	IR-R	0.0082478	1.60006		0.644	NCSP
Rab GDP dissociation inhibitor beta	GDI2	P50395	IR-R	0.0297601	10.6427		0.315	NO
Coatomer subunit alpha;Isoform 2 of Coatomer subunit alpha	COPA	P53621	IR-R	0.0451276	1.49599		0.331	NO
Nucleosome assembly protein 1-like 1;Isoform 2 of Nucleosome assembly protein 1-like 1	NAP1L1	P55209	IR-R	0.00578393	2.01769		0.042	NO
Puromycin-sensitive aminopeptidase	NPEPPS	P55786	IR-R	0.000968309	1.75003		0.436	NO
Triosephosphate isomerase;Isoform 2 of Triosephosphate isomerase	TPI1	P60174	IR-R	0.0189339	1.85715		0.510	NO
Proteasome subunit alpha type-6	PSMA6	P60900	IR-R	0.00162168	1.95092		0.429	NO
Alpha-centractin	ACTR1A	P61163	IR-R	0.000308002	1.72135		0.375	NO
Ras-related protein Rap-1b	RAP1B	P61224	IR-R	6.12137e-06	7.01176		0.692	NCSP
Beta-2-microglobulin	B2M	P61769	IR-R	0.0473864	1.98241	20	0.773	YES
Coatomer subunit zeta-1;Isoform 5 of Coatomer subunit zeta-1	COPZ1	P61923	IR-R	0.0474662	0.596034		0.455	NO
Peptidyl-prolyl cis-trans isomerase A	PPIA	P62937	IR-R	0.00164142	2.90501		0.339	NO
14-3-3 protein zeta/delta	YWHAZ	P63104	IR-R	0.0392738	1.56255		0.252	NO
Tropomyosin alpha-4 chain	TPM4	P67936	IR-R	4.23638e-07	1.55771		0.417	NO
T-complex protein 1 subunit beta	CCT2	P78371	IR-R	0.0285364	1.63101		0.446	NO
Keratin, type II cuticular Hb5	KRT85	P78386	IR-R	0.046095	0.345777		0.224	NO
Spectrin beta chain, non-erythrocytic 1	SPTBN1	Q01082	IR-R	0.00246516	5.13575		0.177	NO
Adenylyl cyclase-associated protein 1	CAP1	Q01518	IR-R	0.000140968	2.33749		0.429	NO
Tyrosine-protein kinase BTK;Isoform BTK-C of Tyrosine-protein kinase BTK	BTK	Q06187	IR-R	0.0286585	1.52357		0.357	NO
Peroxiredoxin-1	PRDX1	Q06830	IR-R	0.0208855	1.64983		0.528	NO
Galectin-3-binding protein	LGALS3BP	Q08380	IR-R	2.8428e-07	0.596494	18	0.785	YES
Multimerin-1	MMRN1	Q13201	IR-R	5.98714e-09	2.15998	19	0.740	YES
Dynactin subunit 2;Isoform 2 of Dynactin subunit 2;Isoform 3 of Dynactin subunit 2	DCTN2	Q13561	IR-R	0.0130314	2.21994		0.314	NO
Ras GTPase-activating-like protein IQGAP2	IQGAP2	Q13576	IR-R	1.73884e-08	1.70798		0.257	NO
Bleomycin hydrolase	BLMH	Q13867	IR-R	0.0299012	1.84774		0.514	NO
Ras suppressor protein 1	RSU1	Q15404	IR-R	0.0428305	2.86761		0.562	NO
WD repeat-containing protein 44;Isoform 2 of WD repeat-containing protein 44	WDR44	Q5JSH3	IR-R	0.0064995	1.51376		0.200	NO
Ragulator complex protein LAMTOR1	LAMTOR1	Q6IAA8	IR-R	0.00974033	0.642271		0.663	NCSP
Twinfilin-2	TWF2	Q6IBS0	IR-R	0.0437204	2.50143		0.418	NO
Suprabasin	SBSN	Q6UWP8	IR-R	0.049824	5.29506	25	0.817	YES
Olfactomedin-4	OLFM4	Q6UX06	IR-R	2.47122e-09	0.525208	20	0.911	YES
Serine/threonine-protein kinase TAO1	TAOK1	Q7L7X3	IR-R	0.0421552	1.56125		0.395	NO
Aldehyde dehydrogenase family 16 member A1	ALDH16A1	Q8IZ83	IR-R	0.000278205	3.35077		0.850	NCSP
Keratin, type II cytoskeletal 78	KRT78	Q8N1N4	IR-R	0.0133353	3.58675		0.246	NO
Matrix metalloproteinase-25	MMP25	Q9NPA2	IR-R	0.0122357	0.388708	21	0.936	YES
Bridging integrator 2	BIN2	Q9UBW5	IR-R	0.000219265	2.23923		0.482	NO
Coronin-1C;Isoform 2 of Coronin-1C;Isoform 3 of Coronin-1C	CORO1C	Q9ULV4	IR-R	0.0226274	1.55151		0.584	NO
Deoxyribose-phosphate aldolase	DERA	Q9Y315	IR-R	0.00308126	10.0285		0.492	NO
Apolipoprotein L1;Isoform 2 of Apolipoprotein L1	APOL1	O14791	IS-NR	0.0109898	0.591506	27	0.853	YES
Exportin-1	XPO1	O14980	IS-NR	0.01487	2.09734		0.604	NCSP
Serine/threonine-protein phosphatase 6 regulatory ankyrin repeat subunit A;Isoform 3 of Serine/threonine-protein phosphatase 6 regulatory ankyrin repeat subunit A;Isoform 2 of Serine/threonine-protein phosphatase 6 regulatory ankyrin repeat subunit A;Isoform 4 of Serine/threonine-protein phosphatase 6 regulatory ankyrin repeat subunit A	ANKRD28	O15084	IS-NR	0.0427734	0.220335		0.565	NO
Keratin, type II cuticular Hb6	KRT86	O43790	IS-NR	0.0206758	0.333141		0.167	NO
Isocitrate dehydrogenase [NADP] cytoplasmic	IDH1	O75874	IS-NR	0.0331973	2.52692		0.547	NO
Keratin, type I cuticular Ha3-I	KRT33A	O76009	IS-NR	0.000449822	0.176169		0.592	NO
Importin-7	IPO7	O95373	IS-NR	0.00938796	0.317971		0.532	NO
Vascular non-inflammatory molecule 2;Isoform 6 of Vascular non-inflammatory molecule 2	VNN2	O95498	IS-NR	0.0135725	0.505838	22	0.614	YES
Plasminogen	PLG	P00747	IS-NR	6.29631e-05	2.35911	19	0.767	YES
Coagulation factor XII	F12	P00748	IS-NR	0.0244414	1.99936	19	0.897	YES
Carbonic anhydrase 1	CA1	P00915	IS-NR	0.0111949	3.61744		0.620	NCSP
Antithrombin-III	SERPINC1	P01008	IS-NR	0.0131241	1.68557	34	0.611	YES
Alpha-1-antitrypsin	SERPINA1	P01009	IS-NR	0.0332952	1.52657	24	0.916	YES
Kininogen-1	KNG1	P01042	IS-NR	2.84455e-14	7.69478	23	0.781	YES
HLA class II histocompatibility antigen, DR alpha chain	HLA-DRA	P01903	IS-NR	0.041495	0.482242	25	0.739	YES
Hemoglobin subunit delta	HBD	P02042	IS-NR	0.00509246	3.46771		0.483	NO
Keratin, type II cytoskeletal 6A	KRT6A	P02538	IS-NR	0.00409155	2.29149		0.103	NO
Spectrin alpha chain, erythrocytic 1	SPTA1	P02549	IS-NR	1.91588e-07	9.46587		0.249	NO
Apolipoprotein A-I	APOA1	P02647	IS-NR	4.35885e-05	0.483573	18	0.847	YES
Apolipoprotein E	APOE	P02649	IS-NR	3.23778e-36	0.489838	18	0.919	YES
Band 3 anion transport protein	SLC4A1	P02730	IS-NR	9.57407e-10	4.13329		0.487	NO
Retinol-binding protein 4	RBP4	P02753	IS-NR	0.0204708	1.93143	18	0.923	YES
Alpha-2-HS-glycoprotein	AHSG	P02765	IS-NR	0.000790845	2.32139	18	0.880	YES
Platelet basic protein	PPBP	P02775	IS-NR	0.000151095	1.87013	34	0.813	YES
Coagulation factor XI	F11	P03951	IS-NR	0.0224432	17.0284	18	0.796	YES
Catalase	CAT	P04040	IS-NR	4.26526e-05	1.84852		0.406	NO
Apolipoprotein B-100	APOB	P04114	IS-NR	3.34169e-260	0.304766	27	0.930	YES
Histidine-rich glycoprotein	HRG	P04196	IS-NR	1.07096e-11	16.0994	18	0.910	YES
Alpha-1B-glycoprotein	A1BG	P04217	IS-NR	0.0354123	2.06443	21	0.875	YES
Heparin cofactor 2	SERPIND1	P05546	IS-NR	1.75571e-05	1.9393	19	0.862	YES
ATP synthase subunit beta, mitochondrial	ATP5F1B	P06576	IS-NR	0.00757504	1.76567		0.591	NO
Apolipoprotein A-IV	APOA4	P06727	IS-NR	0.00024189	0.506824	20	0.846	YES
Annexin A2;Isoform 2 of Annexin A2	ANXA2	P07355	IS-NR	0.0453631	1.53338		0.743	NCSP
Corticosteroid-binding globulin	SERPINA6	P08185	IS-NR	0.00430767	1.93893	22	0.783	YES
Apolipoprotein(a)	LPA	P08519	IS-NR	5.08749e-15	0.4591	19	0.682	YES
Serum amyloid A-1 protein	SAA1	P0DJI8	IS-NR	0.0314855	0.246163	18	0.819	YES
60 kDa heat shock protein, mitochondrial	HSPD1	P10809	IS-NR	0.00130871	1.81109		0.289	NO
Solute carrier family 2, facilitated glucose transporter member 1	SLC2A1	P11166	IS-NR	0.0157376	3.53657		0.331	NO
Solute carrier family 2, facilitated glucose transporter member 3	SLC2A3	P11169	IS-NR	0.0324675	1.72259		0.283	NO
Protein 4.1;Isoform 2 of Protein 4.1	EPB41	P11171	IS-NR	7.13963e-06	8.29976		0.398	NO
Integrin alpha-M;Isoform 2 of Integrin alpha-M	ITGAM	P11215	IS-NR	0.000248852	0.651391	16	0.868	YES
Isoform 2 of Spectrin beta chain, erythrocytic	SPTB	P11277	IS-NR	5.78555e-19	9.7019		0.240	NO
Angiotensin-converting enzyme	ACE	P12821	IS-NR	0.00806332	0.0638348	29	0.863	YES
Delta-aminolevulinic acid dehydratase	ALAD	P13716	IS-NR	8.30985e-05	2.1081		0.637	NCSP
HLA class II histocompatibility antigen, DRB1-4 beta chain	HLA-DRB1	P13760	IS-NR	0.00140175	0.528444	29	0.753	YES
Acylamino-acid-releasing enzyme	APEH	P13798	IS-NR	0.00424845	2.13701		0.547	NO
Aminopeptidase N	ANPEP	P15144	IS-NR	0.00514892	0.509667		0.575	NO
Ankyrin-1;Isoform Er9 of Ankyrin-1;Isoform Er11 of Ankyrin-1;Isoform Er13 of Ankyrin-1;Isoform Er15 of Ankyrin-1;Isoform Er5 of Ankyrin-1;Isoform Er3 of Ankyrin-1;Isoform Er7 of Ankyrin-1	ANK1	P16157	IS-NR	2.72616e-20	6.93603		0.443	NO
Isoform Long of Erythrocyte membrane protein band 4.2	EPB42	P16452	IS-NR	4.24355e-06	6.32577		0.514	NO
Complement receptor type 1	CR1	P17927	IS-NR	0.0267592	2.57003	41	0.515	YES
Hexokinase-1	HK1	P19367	IS-NR	0.000851843	1.74679		0.364	NO
Inter-alpha-trypsin inhibitor heavy chain H2	ITIH2	P19823	IS-NR	3.85986e-10	1.96506	18	0.791	YES
Inter-alpha-trypsin inhibitor heavy chain H1	ITIH1	P19827	IS-NR	0.00892057	2.32394	29	0.760	YES
T-cell surface glycoprotein CD3 zeta chain;Isoform 3 of T-cell surface glycoprotein CD3 zeta chain	CD247	P20963	IS-NR	0.00487857	0.442231	21	0.651	YES
Erythrocyte band 7 integral membrane protein	STOM	P27105	IS-NR	7.39019e-06	1.52334		0.224	NO
Carcinoembryonic antigen-related cell adhesion molecule 8	CEACAM8	P31997	IS-NR	0.0479222	0.341925	34	0.684	YES
Keratin, type I cytoskeletal 9	KRT9	P35527	IS-NR	0.00144325	2.32724		0.089	NO
Serum amyloid A-4 protein	SAA4	P35542	IS-NR	4.26019e-06	0.390347	18	0.709	YES
Alpha-adducin;Isoform 2 of Alpha-adducin;Isoform 3 of Alpha-adducin;Isoform 6 of Alpha-adducin	ADD1	P35611	IS-NR	0.0031819	5.37882		0.145	NO
Glycerol-3-phosphate dehydrogenase, mitochondrial	GPD2	P43304	IS-NR	0.0445028	1.66095		0.401	NO
Galectin-7	LGALS7	P47929	IS-NR	0.00973385	0.649963		0.673	NCSP
Lumican	LUM	P51884	IS-NR	0.0463453	1.61113	18	0.849	YES
Apolipoprotein C-IV	APOC4	P55056	IS-NR	0.00012443	0.108446	22	0.787	YES
Transitional endoplasmic reticulum ATPase	VCP	P55072	IS-NR	8.89611e-11	1.68146		0.163	NO
Ras-related protein Rab-2A	RAB2A	P61019	IS-NR	0.0355032	1.53521		0.345	NO
Ras-related protein Rap-2b	RAP2B	P61225	IS-NR	0.0459976	1.50319		0.775	NCSP
Ras-related protein Rab-1A	RAB1A	P62820	IS-NR	0.0394686	4.60359		0.397	NO
GTP-binding nuclear protein Ran	RAN	P62826	IS-NR	0.00249774	1.52061		0.582	NO
S-phase kinase-associated protein 1	SKP1	P63208	IS-NR	0.0193782	1.84744		0.648	NCSP
Hemoglobin subunit beta	HBB	P68871	IS-NR	3.62851e-05	2.58576		0.469	NO
Hemoglobin subunit alpha	HBA1	P69905	IS-NR	9.92354e-06	2.57437		0.349	NO
Cytochrome c	CYCS	P99999	IS-NR	0.0409137	1.65745		0.465	NO
55 kDa erythrocyte membrane protein	MPP1	Q00013	IS-NR	0.0034497	2.57259		0.515	NO
Platelet-activating factor acetylhydrolase	PLA2G7	Q13093	IS-NR	0.0152515	0.192729	21	0.765	YES
Isoform 3 of Na(+)/H(+) exchange regulatory cofactor NHE-RF2	SLC9A3R2	Q15599	IS-NR	0.0158661	0.529516		0.648	NCSP
Leukotriene B4 receptor 1	LTB4R	Q15722	IS-NR	0.0253158	0.374147		0.804	NO
Neutral amino acid transporter B(0)	SLC1A5	Q15758	IS-NR	0.0236595	0.552866		0.734	NCSP
Sushi, von Willebrand factor type A, EGF and pentraxin domain-containing protein 1	SVEP1	Q4LDE5	IS-NR	0.00116288	3.4759	17	0.766	YES
Olfactomedin-4	OLFM4	Q6UX06	IS-NR	0.023983	0.658512	20	0.911	YES
Nicotinate phosphoribosyltransferase;Isoform 3 of Nicotinate phosphoribosyltransferase	NAPRT	Q6XQN6	IS-NR	0.0139242	1.82513		0.335	NO
Cullin-associated NEDD8-dissociated protein 1	CAND1	Q86VP6	IS-NR	3.87478e-05	2.42932		0.417	NO
BTB/POZ domain-containing protein KCTD12	KCTD12	Q96CX2	IS-NR	0.0497311	0.453903		0.791	NCSP
N-acetylmuramoyl-L-alanine amidase;Isoform 2 of N-acetylmuramoyl-L-alanine amidase	PGLYRP2	Q96PD5	IS-NR	0.000701089	2.68382	21	0.893	YES
Tubulin alpha-1C chain	TUBA1C	Q9BQE3	IS-NR	0.041253	1.65842		0.481	NO
Adipocyte plasma membrane-associated protein	APMAP	Q9HDC9	IS-NR	0.0101482	0.605616		0.820	NCSP
GTP-binding protein SAR1a	SAR1A	Q9NR31	IS-NR	0.0488054	2.26227		0.533	NO
Prenylcysteine oxidase 1	PCYOX1	Q9UHG3	IS-NR	4.79346e-13	0.315561	27	0.754	YES
Voltage-dependent anion-selective channel protein 3	VDAC3	Q9Y277	IS-NR	0.00802036	1.86509		0.405	NO
EMILIN-1	EMILIN1	Q9Y6C2	IS-NR	0.00908709	2.75425	23	0.784	YES
Immunoglobulin heavy variable 4-28	IGHV4-28	A0A0C4DH34	T2D-R	0.047963	3.26418	19	0.912	YES
Small integral membrane protein 1	SMIM1	B2RUZ4	T2D-R	0.0443422	1.86467		0.567	NO
Dynamin-1-like protein;Isoform 2 of Dynamin-1-like protein	DNM1L	O00429	T2D-R	0.0412135	0.299346		0.261	NO
Isoform FYB-130 of FYN-binding protein 1;Isoform 3 of FYN-binding protein 1	FYB1	O15117	T2D-R	0.00711558	0.630904		0.101	NO
Syntaxin-7;Isoform 2 of Syntaxin-7	STX7	O15400	T2D-R	0.000371156	1.60059		0.330	NO
CD5 antigen-like	CD5L	O43866	T2D-R	0.000276586	1.6494	18	0.731	YES
Programmed cell death protein 6	PDCD6	O75340	T2D-R	0.0290172	2.68154		0.773	NCSP
Src kinase-associated phosphoprotein 2	SKAP2	O75563	T2D-R	0.0281128	0.620897		0.375	NO
Flotillin-1	FLOT1	O75955	T2D-R	7.63165e-07	2.40701		0.504	NO
Purine nucleoside phosphorylase	PNP	P00491	T2D-R	6.69936e-05	0.552434		0.509	NO
Phosphoglycerate kinase 1	PGK1	P00558	T2D-R	9.9189e-05	0.563578		0.389	NO
Prothrombin	F2	P00734	T2D-R	1.1591e-05	2.93335	24	0.754	YES
Haptoglobin	HP	P00738	T2D-R	0.00454498	1.59832	18	0.879	YES
Plasminogen	PLG	P00747	T2D-R	5.72961e-05	2.16196	19	0.767	YES
Complement factor B	CFB	P00751	T2D-R	0.0327837	1.58763	25	0.743	YES
Carbonic anhydrase 1	CA1	P00915	T2D-R	0.000419915	2.78655		0.620	NCSP
Antithrombin-III	SERPINC1	P01008	T2D-R	0.00289839	3.42979	34	0.611	YES
Alpha-1-antitrypsin	SERPINA1	P01009	T2D-R	0.0292147	0.133163	24	0.916	YES
Kininogen-1	KNG1	P01042	T2D-R	4.53564e-14	1.55952	23	0.781	YES
Immunoglobulin heavy variable 1-69	IGHV1-69	P01742	T2D-R	0.0489324	1.53919	19	0.762	YES
Immunoglobulin heavy constant mu	IGHM	P01871	T2D-R	0.00112022	1.6172		0.569	NO
Immunoglobulin heavy constant alpha 1	IGHA1	P01876	T2D-R	0.0196311	1.5204		0.732	NCSP
Hemoglobin subunit delta	HBD	P02042	T2D-R	0.00489749	1.57259		0.483	NO
Apolipoprotein E	APOE	P02649	T2D-R	1.24317e-17	0.327319	18	0.919	YES
Fibrinogen alpha chain	FGA	P02671	T2D-R	2.79522e-20	9.22596	19	0.812	YES
Fibrinogen beta chain	FGB	P02675	T2D-R	1.9712e-17	9.11674	30	0.861	YES
Fibrinogen gamma chain;Isoform Gamma-A of Fibrinogen gamma chain	FGG	P02679	T2D-R	1.2859e-05	8.3813	26	0.808	YES
Band 3 anion transport protein	SLC4A1	P02730	T2D-R	2.58344e-14	1.89197		0.487	NO
Complement C1q subcomponent subunit B	C1QB	P02746	T2D-R	7.06763e-06	3.66916	27	0.935	YES
Complement C1q subcomponent subunit C	C1QC	P02747	T2D-R	0.0129965	3.58679	28	0.878	YES
Beta-2-glycoprotein 1	APOH	P02749	T2D-R	0.000183668	0.15359	19	0.826	YES
Isoform 14 of Fibronectin;Isoform 8 of Fibronectin	FN1	P02751	T2D-R	1.89146e-48	3.4149	26	0.598	YES
Alpha-2-HS-glycoprotein	AHSG	P02765	T2D-R	0.000723864	2.03688	18	0.880	YES
Platelet basic protein	PPBP	P02775	T2D-R	0.0239114	0.360547	34	0.813	YES
Serotransferrin	TF	P02787	T2D-R	0.00471435	0.236595	19	0.934	YES
C4b-binding protein alpha chain	C4BPA	P04003	T2D-R	0.000286702	1.76954		0.531	NO
Vitronectin	VTN	P04004	T2D-R	0.000392894	1.94969	19	0.936	YES
Annexin 1	ANXA1	P04083	T2D-R	0.00283572	0.592815		0.511	NO
Apolipoprotein B-100	APOB	P04114	T2D-R	1.00402e-56	0.181133	27	0.930	YES
Histidine-rich glycoprotein	HRG	P04196	T2D-R	1.1106e-09	0.045153	18	0.910	YES
Keratin, type II cytoskeletal 1	KRT1	P04264	T2D-R	1.53643e-07	0.569413		0.099	NO
Heat shock protein beta-1	HSPB1	P04792	T2D-R	0.00164567	0.565317		0.740	NCSP
Integrin beta-2	ITGB2	P05107	T2D-R	2.05462e-06	1.59888	22	0.902	YES
Coagulation factor XIII B chain	F13B	P05160	T2D-R	0.000239083	6.85144	20	0.771	YES
Tetranectin	CLEC3B	P05452	T2D-R	0.0103295	4.91484	21	0.898	YES
Isoform Beta-II of Protein kinase C beta type	PRKCB	P05771	T2D-R	0.017506	0.596303		0.251	NO
Immunoglobulin kappa variable 2-30	IGKV2-30	P06310	T2D-R	0.0158138	1.76696	20	0.856	YES
Alpha-enolase	ENO1	P06733	T2D-R	3.7037e-09	0.647417		0.536	NO
L-lactate dehydrogenase B chain	LDHB	P07195	T2D-R	1.71039e-05	0.612537		0.569	NO
Vitamin K-dependent protein S	PROS1	P07225	T2D-R	0.00253835	2.3368	24	0.895	YES
Apolipoprotein(a)	LPA	P08519	T2D-R	0.00716887	0.485504	19	0.682	YES
Complement factor H	CFH	P08603	T2D-R	0.00321736	2.98208	18	0.911	YES
Glutathione S-transferase P	GSTP1	P09211	T2D-R	0.00122844	0.600765		0.545	NO
Tyrosine-protein kinase Fgr	FGR	P09769	T2D-R	0.0191579	1.57935		0.506	NO
Complement C4-B	C4B	P0C0L5	T2D-R	3.38509e-18	0.0461902	19	0.731	YES
Immunoglobulin alpha-2 heavy chain	NaN	P0DOX2	T2D-R	0.0109574	1.59967		0.503	NO
Immunoglobulin mu heavy chain	NaN	P0DOX6	T2D-R	0.0298431	0.0740687		0.591	NO
cAMP-dependent protein kinase type I-alpha regulatory subunit	PRKAR1A	P10644	T2D-R	0.00859346	0.561442		0.441	NO
Solute carrier family 2, facilitated glucose transporter member 1	SLC2A1	P11166	T2D-R	6.15597e-07	2.58449		0.331	NO
Protein 4.1;Isoform 2 of Protein 4.1	EPB41	P11171	T2D-R	2.8544e-06	2.58593		0.398	NO
Integrin alpha-M;Isoform 2 of Integrin alpha-M	ITGAM	P11215	T2D-R	0.000951647	0.174214	16	0.868	YES
Isoform 2 of Spectrin beta chain, erythrocytic	SPTB	P11277	T2D-R	1.39617e-53	5.22294		0.240	NO
Pyruvate kinase PKM	PKM	P14618	T2D-R	0.00306604	0.657296		0.420	NO
Carbonyl reductase [NADPH] 1	CBR1	P16152	T2D-R	0.0175704	0.654177		0.633	NCSP
Ankyrin-1;Isoform Er9 of Ankyrin-1;Isoform Er11 of Ankyrin-1;Isoform Er13 of Ankyrin-1;Isoform Er15 of Ankyrin-1;Isoform Er5 of Ankyrin-1;Isoform Er3 of Ankyrin-1;Isoform Er7 of Ankyrin-1	ANK1	P16157	T2D-R	7.51893e-29	5.90901		0.443	NO
Isoform Long of Erythrocyte membrane protein band 4.2	EPB42	P16452	T2D-R	3.01985e-05	7.31409		0.514	NO
Vinculin;Isoform 1 of Vinculin	VCL	P18206	T2D-R	1.4256e-24	0.225241		0.181	NO
Lipopolysaccharide-binding protein	LBP	P18428	T2D-R	0.0133123	0.22135	25	0.848	YES
Inter-alpha-trypsin inhibitor heavy chain H2	ITIH2	P19823	T2D-R	0.000828714	2.12294	18	0.791	YES
Inter-alpha-trypsin inhibitor heavy chain H1	ITIH1	P19827	T2D-R	0.00773687	2.27444	29	0.760	YES
Annexin A7;Isoform 2 of Annexin A7	ANXA7	P20073	T2D-R	0.00133284	3.01823		0.805	NCSP
5'-nucleotidase;Isoform 2 of 5'-nucleotidase	NT5E	P21589	T2D-R	0.00768369	4.14415	26	0.873	YES
Ubiquitin-like modifier-activating enzyme 1;Isoform 2 of Ubiquitin-like modifier-activating enzyme 1	UBA1	P22314	T2D-R	0.0231264	0.33812		0.530	NO
Isoform 2 of cAMP-dependent protein kinase catalytic subunit beta	PRKACB	P22694	T2D-R	1.91326e-05	0.581495		0.306	NO
Aquaporin-1	AQP1	P29972	T2D-R	0.0304273	2.07075		0.359	NO
Sorcin;Isoform 2 of Sorcin;Isoform 3 of Sorcin	SRI	P30626	T2D-R	0.0111612	5.46798		0.912	NCSP
Coronin-1A	CORO1A	P31146	T2D-R	0.00294691	0.282877		0.775	NCSP
Rab GDP dissociation inhibitor alpha	GDI1	P31150	T2D-R	0.0128369	0.661989		0.429	NO
Alpha-adducin;Isoform 2 of Alpha-adducin;Isoform 3 of Alpha-adducin;Isoform 6 of Alpha-adducin	ADD1	P35611	T2D-R	1.39494e-05	2.11719		0.145	NO
Transgelin-2;Isoform 2 of Transgelin-2	TAGLN2	P37802	T2D-R	8.62972e-07	0.553789		0.784	NCSP
Platelet glycoprotein V	GP5	P40197	T2D-R	0.00173634	0.336219	16	0.844	YES
Guanine nucleotide-binding protein G(q) subunit alpha	GNAQ	P50148	T2D-R	0.0333033	0.152597		0.424	NO
Rab GDP dissociation inhibitor beta	GDI2	P50395	T2D-R	0.0239114	0.0558974		0.315	NO
Basal cell adhesion molecule	BCAM	P50895	T2D-R	0.00207776	3.00557	31	0.742	YES
Rho GDP-dissociation inhibitor 2	ARHGDIB	P52566	T2D-R	1.1591e-05	0.655935		0.397	NO
Apolipoprotein C-IV	APOC4	P55056	T2D-R	1.9753e-05	0.072066	22	0.787	YES
Nucleosome assembly protein 1-like 1;Isoform 2 of Nucleosome assembly protein 1-like 1	NAP1L1	P55209	T2D-R	0.0218283	0.571031		0.042	NO
Triosephosphate isomerase;Isoform 2 of Triosephosphate isomerase	TPI1	P60174	T2D-R	1.17086e-06	0.611466		0.510	NO
Ras-related protein Rap-1b	RAP1B	P61224	T2D-R	0.0043266	0.106666		0.692	NCSP
14-3-3 protein zeta/delta	YWHAZ	P63104	T2D-R	0.00435122	0.248942		0.252	NO
Actin, alpha skeletal muscle	ACTA1	P68133	T2D-R	0.0266804	0.581984		0.504	NO
Hemoglobin subunit beta	HBB	P68871	T2D-R	4.64741e-08	2.01887		0.469	NO
Hemoglobin subunit gamma-2	HBG2	P69892	T2D-R	0.02446	1.78028		0.519	NO
Glutathione S-transferase omega-1	GSTO1	P78417	T2D-R	0.00615874	0.663265		0.435	NO
55 kDa erythrocyte membrane protein	MPP1	Q00013	T2D-R	0.0297601	1.73003		0.515	NO
Clathrin heavy chain 1;Isoform 2 of Clathrin heavy chain 1	CLTC	Q00610	T2D-R	1.88345e-14	2.91417		0.437	NO
Adenylyl cyclase-associated protein 1	CAP1	Q01518	T2D-R	5.26737e-06	0.375811		0.429	NO
Desmoglein-1	DSG1	Q02413	T2D-R	0.0148372	0.602476	23	0.733	YES
Tyrosine-protein kinase BTK;Isoform BTK-C of Tyrosine-protein kinase BTK	BTK	Q06187	T2D-R	0.00037976	0.437761		0.357	NO
Rho GTPase-activating protein 1	ARHGAP1	Q07960	T2D-R	0.00883008	0.453233		0.480	NO
Lactadherin	MFGE8	Q08431	T2D-R	0.0368212	2.55167	23	0.806	YES
Src substrate cortactin	CTTN	Q14247	T2D-R	0.0409137	0.545636		0.341	NO
Flotillin-2	FLOT2	Q14254	T2D-R	1.83015e-10	3.08182		0.433	NO
Ras suppressor protein 1	RSU1	Q15404	T2D-R	0.00140052	0.342076		0.562	NO
Ficolin-2	FCN2	Q15485	T2D-R	0.00190782	6.23981	25	0.869	YES
Myosin light chain kinase, smooth muscle;Isoform 2 of Myosin light chain kinase, smooth muscle;Isoform 3A of Myosin light chain kinase, smooth muscle;Isoform 3B of Myosin light chain kinase, smooth muscle;Isoform 5 of Myosin light chain kinase, smooth muscle	MYLK	Q15746	T2D-R	0.00712334	0.59759		0.376	NO
Sushi, von Willebrand factor type A, EGF and pentraxin domain-containing protein 1	SVEP1	Q4LDE5	T2D-R	0.00400876	1.49873	17	0.766	YES
Rap1 GTPase-activating protein 2;Isoform 2 of Rap1 GTPase-activating protein 2;Isoform 3 of Rap1 GTPase-activating protein 2	RAP1GAP2	Q684P5	T2D-R	0.00467544	0.36105		0.338	NO
Twinfilin-2	TWF2	Q6IBS0	T2D-R	0.00053037	0.469443		0.418	NO
Olfactomedin-4	OLFM4	Q6UX06	T2D-R	1.87172e-05	3.21162	20	0.911	YES
Docking protein 3	DOK3	Q7L591	T2D-R	0.0339711	0.557076		0.318	NO
Fermitin family homolog 3	FERMT3	Q86UX7	T2D-R	1.93733e-07	0.209306		0.223	NO
Programmed cell death 6-interacting protein	PDCD6IP	Q8WUM4	T2D-R	0.00289839	1.83205		0.143	NO
Protein lifeguard 3	TMBIM1	Q969X1	T2D-R	0.0132439	1.85143		0.684	NCSP
Calponin-2	CNN2	Q99439	T2D-R	8.77134e-05	0.648157		0.500	NO
Protein/nucleic acid deglycase DJ-1	PARK7	Q99497	T2D-R	0.00066636	0.608245		0.493	NO
Equilibrative nucleoside transporter 1;Isoform 2 of Equilibrative nucleoside transporter 1	SLC29A1	Q99808	T2D-R	0.00728368	2.06959		0.499	NO
Bridging integrator 2	BIN2	Q9UBW5	T2D-R	0.000774746	0.45696		0.482	NO
Prenylcysteine oxidase 1	PCYOX1	Q9UHG3	T2D-R	0.0165843	0.367533	27	0.754	YES
Leucyl-cystinyl aminopeptidase;Isoform 2 of Leucyl-cystinyl aminopeptidase;Isoform 3 of Leucyl-cystinyl aminopeptidase	LNPEP	Q9UIQ6	T2D-R	0.0192698	3.27045		0.641	NCSP
Ribosome maturation protein SBDS	SBDS	Q9Y3A5	T2D-R	0.0207671	0.498063		0.627	NCSP
CD2-associated protein	CD2AP	Q9Y5K6	T2D-R	0.0192432	0.393406		0.202	NO

## Sheet: overlapping T2D-R and IR-R
Table S3 List of significant proteins 12-wk versus baseline overlapping in T2D-R (N=5) and IR-R (N=5)
Protein	Gene	Uniprot ID	group	q value	FC 12-wk vs baseline	Cleavage site	Score	SP
Dynamin-1-like protein;Isoform 2 of Dynamin-1-like protein	DNM1L	O00429	IR-R	1.3921e-05	1.72772		0.261	NO
Dynamin-1-like protein;Isoform 2 of Dynamin-1-like protein	DNM1L	O00429	T2D-R	0.0412135	0.299346		0.261	NO
Purine nucleoside phosphorylase	PNP	P00491	IR-R	0.000828714	1.65512		0.509	NO
Purine nucleoside phosphorylase	PNP	P00491	T2D-R	6.69936e-05	0.552434		0.509	NO
Complement factor B	CFB	P00751	IR-R	2.19832e-05	0.515589	25	0.743	YES
Complement factor B	CFB	P00751	T2D-R	0.0327837	1.58763	25	0.743	YES
Fibrinogen alpha chain	FGA	P02671	IR-R	9.41847e-11	5.26729	19	0.812	YES
Fibrinogen alpha chain	FGA	P02671	T2D-R	2.79522e-20	9.22596	19	0.812	YES
Fibrinogen beta chain	FGB	P02675	IR-R	2.81563e-06	3.39754	30	0.861	YES
Fibrinogen beta chain	FGB	P02675	T2D-R	1.9712e-17	9.11674	30	0.861	YES
Fibrinogen gamma chain;Isoform Gamma-A of Fibrinogen gamma chain	FGG	P02679	IR-R	1.6777e-06	4.02601	26	0.808	YES
Fibrinogen gamma chain;Isoform Gamma-A of Fibrinogen gamma chain	FGG	P02679	T2D-R	1.2859e-05	8.3813	26	0.808	YES
Complement C1q subcomponent subunit B	C1QB	P02746	IR-R	0.000241269	0.509563	27	0.935	YES
Complement C1q subcomponent subunit B	C1QB	P02746	T2D-R	7.06763e-06	3.66916	27	0.935	YES
Complement C1q subcomponent subunit C	C1QC	P02747	IR-R	0.00203688	0.571875	28	0.878	YES
Complement C1q subcomponent subunit C	C1QC	P02747	T2D-R	0.0129965	3.58679	28	0.878	YES
Serotransferrin	TF	P02787	IR-R	8.0424e-15	1.56475	19	0.934	YES
Serotransferrin	TF	P02787	T2D-R	0.00471435	0.236595	19	0.934	YES
Annexin 1	ANXA1	P04083	IR-R	0.0278373	2.96004		0.511	NO
Annexin 1	ANXA1	P04083	T2D-R	0.00283572	0.592815		0.511	NO
Keratin, type II cytoskeletal 1	KRT1	P04264	IR-R	2.45338e-08	1.70018		0.099	NO
Keratin, type II cytoskeletal 1	KRT1	P04264	T2D-R	1.53643e-07	0.569413		0.099	NO
Alpha-enolase	ENO1	P06733	IR-R	5.16947e-05	1.80661		0.536	NO
Alpha-enolase	ENO1	P06733	T2D-R	3.7037e-09	0.647417		0.536	NO
L-lactate dehydrogenase B chain	LDHB	P07195	IR-R	0.000262714	1.50175		0.569	NO
L-lactate dehydrogenase B chain	LDHB	P07195	T2D-R	1.71039e-05	0.612537		0.569	NO
Complement factor H	CFH	P08603	IR-R	4.07371e-08	0.504819	18	0.911	YES
Complement factor H	CFH	P08603	T2D-R	0.00321736	2.98208	18	0.911	YES
Complement C4-B	C4B	P0C0L5	IR-R	3.70329e-09	12.812	19	0.731	YES
Complement C4-B	C4B	P0C0L5	T2D-R	3.38509e-18	0.0461902	19	0.731	YES
Vinculin;Isoform 1 of Vinculin	VCL	P18206	IR-R	3.84968e-23	1.98228		0.181	NO
Vinculin;Isoform 1 of Vinculin	VCL	P18206	T2D-R	1.4256e-24	0.225241		0.181	NO
Rab GDP dissociation inhibitor alpha	GDI1	P31150	IR-R	0.0176584	1.51649		0.429	NO
Rab GDP dissociation inhibitor alpha	GDI1	P31150	T2D-R	0.0128369	0.661989		0.429	NO
Transgelin-2;Isoform 2 of Transgelin-2	TAGLN2	P37802	IR-R	0.00110736	2.74172		0.784	NCSP
Transgelin-2;Isoform 2 of Transgelin-2	TAGLN2	P37802	T2D-R	8.62972e-07	0.553789		0.784	NCSP
Platelet glycoprotein V	GP5	P40197	IR-R	0.00130965	2.83508	16	0.844	YES
Platelet glycoprotein V	GP5	P40197	T2D-R	0.00173634	0.336219	16	0.844	YES
Rab GDP dissociation inhibitor beta	GDI2	P50395	IR-R	0.0297601	10.6427		0.315	NO
Rab GDP dissociation inhibitor beta	GDI2	P50395	T2D-R	0.0239114	0.0558974		0.315	NO
Nucleosome assembly protein 1-like 1;Isoform 2 of Nucleosome assembly protein 1-like 1	NAP1L1	P55209	IR-R	0.00578393	2.01769		0.042	NO
Nucleosome assembly protein 1-like 1;Isoform 2 of Nucleosome assembly protein 1-like 1	NAP1L1	P55209	T2D-R	0.0218283	0.571031		0.042	NO
Triosephosphate isomerase;Isoform 2 of Triosephosphate isomerase	TPI1	P60174	IR-R	0.0189339	1.85715		0.510	NO
Triosephosphate isomerase;Isoform 2 of Triosephosphate isomerase	TPI1	P60174	T2D-R	1.17086e-06	0.611466		0.510	NO
Ras-related protein Rap-1b	RAP1B	P61224	IR-R	6.12137e-06	7.01176		0.692	NCSP
Ras-related protein Rap-1b	RAP1B	P61224	T2D-R	0.0043266	0.106666		0.692	NCSP
14-3-3 protein zeta/delta	YWHAZ	P63104	IR-R	0.0392738	1.56255		0.252	NO
14-3-3 protein zeta/delta	YWHAZ	P63104	T2D-R	0.00435122	0.248942		0.252	NO
Adenylyl cyclase-associated protein 1	CAP1	Q01518	IR-R	0.000140968	2.33749		0.429	NO
Adenylyl cyclase-associated protein 1	CAP1	Q01518	T2D-R	5.26737e-06	0.375811		0.429	NO
Tyrosine-protein kinase BTK;Isoform BTK-C of Tyrosine-protein kinase BTK	BTK	Q06187	IR-R	0.0286585	1.52357		0.357	NO
Tyrosine-protein kinase BTK;Isoform BTK-C of Tyrosine-protein kinase BTK	BTK	Q06187	T2D-R	0.00037976	0.437761		0.357	NO
Ras suppressor protein 1	RSU1	Q15404	IR-R	0.0428305	2.86761		0.562	NO
Ras suppressor protein 1	RSU1	Q15404	T2D-R	0.00140052	0.342076		0.562	NO
Twinfilin-2	TWF2	Q6IBS0	IR-R	0.0437204	2.50143		0.418	NO
Twinfilin-2	TWF2	Q6IBS0	T2D-R	0.00053037	0.469443		0.418	NO
Bridging integrator 2	BIN2	Q9UBW5	IR-R	0.000219265	2.23923		0.482	NO
Bridging integrator 2	BIN2	Q9UBW5	T2D-R	0.000774746	0.45696		0.482	NO
